# Systematic review using meta-analyses to estimate dose-response relationships between iodine intake and biomarkers of iodine status in different population groups

Danijela Ristić-Medić, Carla Dullemeijer, Jasna Tepsić, Gordana Petrović-Oggiano, Tamara Popović, Aleksandra Arsić, Marija Glibetić, Olga W Souverein, Rachel Collings, Adriënné Cavelaars, Lisette de Groot, Pieter van't Veer, and Mirjana Gurinović

*The objective of this systematic review was to identify studies investigating iodine intake and biomarkers of iodine status, to assess the data of the selected studies, and to estimate dose-response relationships using meta-analysis. All randomized controlled trials, prospective cohort studies, nested case-control studies, and cross-sectional studies that supplied or measured dietary iodine and measured iodine biomarkers were included. The overall pooled regression coefficient ( $\beta$ ) and the standard error of  $\beta$  were calculated by random-effects meta-analysis on a double-log scale, using the calculated intake-status regression coefficient ( $\beta$ ) for each individual study. The results of pooled randomized controlled trials indicated that the doubling of dietary iodine intake increased urinary iodine concentrations by 14% in children and adolescents, by 57% in adults and the elderly, and by 81% in pregnant women. The dose-response relationship between iodine intake and biomarkers of iodine status indicated a 12% decrease in thyroid-stimulating hormone and a 31% decrease in thyroglobulin in pregnant women. The model of dose-response quantification used to describe the relationship between iodine intake and biomarkers of iodine status may be useful for providing complementary evidence to support recommendations for iodine intake in different population groups.*

© 2014 International Life Sciences Institute

## INTRODUCTION

Adequate intake of iodine is essential for thyroid hormone synthesis and, consequently, for normal development and metabolism.<sup>1,2</sup> The main dietary sources of iodine are iodized salt, saltwater fish, seaweed, and grains (if grown in iodine-replete soils).<sup>3,4</sup> Iodate obtained through the diet is almost completely absorbed. Absorption depends mainly on the level of dietary iodine intake

rather than on the chemical form of iodine or the composition of the diet. Iodine deficiencies, therefore, are due primarily to insufficient intake of the nutrient.<sup>5,6</sup> The World Health Organization (WHO), the International Council for the Control of Iodine Deficiency Disorders (ICCIDD), and the United Nations Children's Fund (UNICEF) recommend iodine intakes of 90 µg/day for preschool children, 150 µg/day for adults, and 250 µg/day for pregnant and lactating women.<sup>7,8</sup> Approximately 44%

Affiliations: D Ristić-Medić, J Tepsić, G Petrović-Oggiano, T Popović, A Arsić, M Glibetić, and M Gurinović are with the Institute for Medical Research, Centre of Research Excellence in Nutrition and Metabolism, University of Belgrade, Belgrade, Serbia. C Dullemeijer, OW Souverein, A Cavelaars, L de Groot, and P van't Veer are with the Division of Human Nutrition, Wageningen University and Research Centre, Wageningen, The Netherlands. R Collings is with the Department of Nutrition, Norwich Medical School, University of East Anglia, Norwich, UK.

Correspondence: D Ristić-Medić, Institute for Medical Research, Centre of Research Excellence in Nutrition and Metabolism, University of Belgrade, Belgrade 11129, Serbia. E-mail: dristicmedic@gmail.com. Phone: +381-11-303-1997. Fax: +381-11-2030-169.

Key words: deficiency, EURRECA, iodine, meta-analysis, systematic review, TSH, urinary iodine

doi:10.1111/nure.12092

Nutrition Reviews® Vol. 72(3):143–161

143

of the European population have mild iodine deficiency, and iodine intakes in other industrialized countries, including the United States and Australia, have decreased in recent years.<sup>7,9</sup>

In order to include the evidence on iodine status and iodine deficiency disorders in the process of developing recommendations for iodine intake, it is essential to know the daily iodine intake level necessary to maintain or achieve optimal values of iodine biomarkers in blood and urine.<sup>10,11</sup> In a previous systematic review undertaken within the European Micronutrient Recommendations Aligned (EURRECA) Network of Excellence,<sup>12</sup> four biomarkers were found to be useful for determining the iodine status of individuals in various population groups: urinary iodine (UI), serum or dried whole-blood spot thyroglobulin (Tg), serum thyroxine (T4), and serum thyroid-stimulating hormone (TSH).

The aim of this systematic review was to identify and examine studies investigating iodine intake and biomarkers of iodine status and to combine these studies in a meta-analysis to estimate the dose-response relationships between iodine intake and iodine status.

## METHODS

This research was conducted within the framework of the EURRECA Network of Excellence.

### Study selection

The search included randomized controlled trials (RCTs), prospective cohort studies, nested case-control studies, and cross-sectional studies. RCTs had to involve an iodine intervention (iodine supplementation given as iodized salt (potassium iodide, potassium iodate, or sodium iodide), iodized oil (orally or by injection), iodized water, iodine tablets, or iodine-enriched food or milk formula), and observational studies had to evaluate dietary iodine intake using a validated food frequency questionnaire, a dietary history method or a 24-h recall method for at least 3 days, or WHO criteria for assessing iodine intake (see below). In addition, only studies that measured iodine status with the most robust and sensitive biomarkers were included, i.e., UI, serum Tg, and serum TSH. Studies were excluded if the intervention period was less than 2 weeks (for RCTs) or if they were performed in patient populations. In addition, commentaries, reviews, or duplicate publications from the same study were excluded. Studies in which iodine was administered in combination with another dietary or other lifestyle intervention were also excluded. Studies that reported insufficient data or had insufficient data obtainable from the authors to estimate  $\beta$  and the standard error (SE) of  $\beta$  (SE[ $\beta$ ]) for the assumed

linear relationship on the log<sub>e</sub>-log<sub>e</sub> scale were also excluded.<sup>13</sup>

The assessment of iodine intake using the WHO-specific criteria for calculating iodine intake in epidemiological settings was accepted in the absence of standard dietary assessment methods.<sup>6</sup> This method of population intake assessment is based on the measurement of the median UI concentration and uses the following formula to calculate daily iodine intake: UI ( $\mu\text{g/L}$ )  $\times$  0.0235  $\times$  body weight (kg). A median UI concentration of 100  $\mu\text{g/L}$  corresponds to an average iodine intake of 150  $\mu\text{g/day}$ .<sup>14</sup> If the WHO method had not been used and an estimate of intake was needed, median daily iodine intake was estimated from the median UI concentration by the method of the Institute of Medicine,<sup>15</sup> which assumes that 92% of dietary iodine is excreted in the urine and calculates a 24-h urine volume in children by using body weight and age-specific median urine volumes for 7- to 15-year-old children.<sup>16</sup>

### Search strategy

Ovid Medline, Embase (OvidSP; both available at <http://www.ovid.com>), and the Cochrane Central Register of Controlled Trials (CENTRAL) database (available at <http://www.thecochranelibrary.com>) were searched from inception to February 2010 for relevant studies using the following search terms: “study designs in humans” AND “iodine” AND (“intake” OR status”). Database alerts were checked from February 2010 until December 2011. Details about the search terms used for all databases can be found in the Supporting Information for this article, available online (Table S1). Additionally, 15 reviews were scrutinized<sup>17–31</sup> in duplicate to search for additional potentially relevant studies. Moreover, the reference lists of the RCTs and the observational studies were also checked. Search results from the three databases were pooled and duplicates removed. Each article was assessed for inclusion on the basis of review of the title and abstract (Figure 1). Full texts were assessed by four investigators to determine inclusion or exclusion, with independent duplicate assessment of a random sample of 50%. Disagreements among investigators were resolved through group discussion.

### Data collection

Data were extracted by five investigators, with independent duplicate assessment of a random sample of 20% conducted by a second investigator. For RCTs, extracted data included population characteristics, source of iodine, dose of iodine in intervention and placebo groups, duration of the study, dietary intake of iodine, mode of delivery, duration of delivery, mean concentrations of UI, serum Tg and serum TSH at baseline and at the end of the

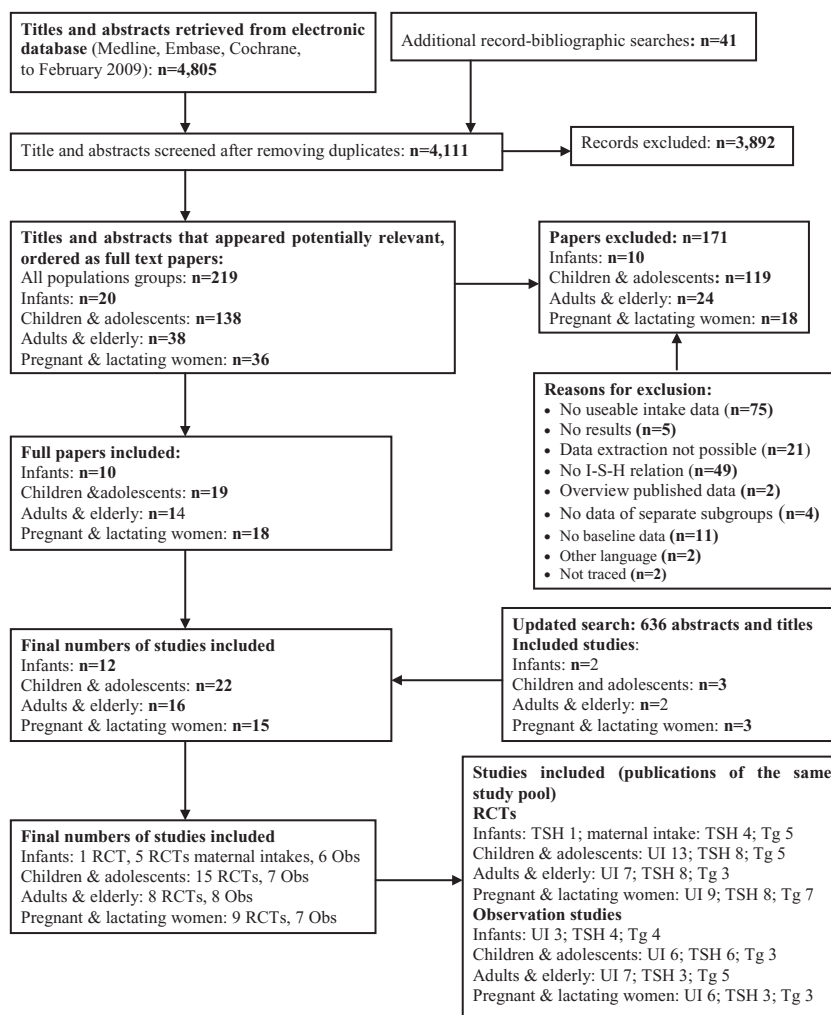

**Figure 1** Flow diagram for the identification of studies included in the systematic review of iodine intake and biomarkers of iodine status.

**Abbreviations:** I-S-H, intake-status-health; Obs, observational studies in children and adolescents; RCT, randomized control trial; Tg, thyroglobulin; TSH, thyroid-stimulating hormone; UI, urinary iodine.

intervention period, and analytical methods used to assess iodine status. For the observational studies, extracted data included population characteristics, mean iodine intake and method used to estimate intake, concentrations of UI, serum Tg, and serum TSH, analytical methods used to assess iodine status, the association and type of association (Spearman's rank correlation coefficient, Pearson's correlation coefficient, linear regression coefficient) between iodine intake and iodine-related biomarkers, and information on any transformations applied to obtain the reported associations. Authors of papers were contacted to request missing data or to clarify methods and results.

### Data synthesis for RCTs

If a study included two or three iodine-treated groups and one common control group, it was treated as two or three

independent estimates in the analysis, and the control group was included more than once in the analysis. In order to check that this approach did not introduce bias to the results, a sensitivity analysis was carried out, removing all but one comparison from each study and re-running the analyses. The control group had to receive either a placebo or a low-dose iodine supplement (low dose had to be defined as providing a dose of <100 µg of iodine per day). In studies administering a single annual dose of iodized oil (mg/yr) and in which the control group received a certain amount of iodine supplementation, the time period for data extraction was selected as being after the lower dose was expected to be fully metabolized (i.e., no residual impact on iodine status) but while a potentially measurable impact on iodine status after the higher dose was still expected.<sup>10</sup> If dietary intake of iodine (on top of the intervention) was not reported, 100 µg/L/day of UI was imputed because this corresponds to the mean daily

iodine intake of RCTs that did report dietary iodine intake.<sup>11,15</sup> An intake-status regression coefficient ( $\beta$ ) and the corresponding SE were calculated for each individual study for use in the meta-analyses.<sup>13</sup>

### Risk of bias in individual studies

The overall risk of bias of each individual study was assessed using indicators of internal validity specific to RCTs, based on the guidance from the Cochrane Handbook.<sup>32</sup> To determine the validity of the included RCTs, the following were determined: 1) method of sequence generation and allocation concealment; 2) description of blinding and type of blinding; 3) number of participants at start, number of dropouts, and reasons for dropout; 4) potential funding bias; 5) dose check; 6) dietary intake data reported; 7) biomarker comparability and reproducibility; and 8) similarity of most and least exposed groups at baseline. To explore the variability in study results (heterogeneity), subgrouping analyses were used to investigate whether the effect of the type/matrix of the iodine provided (iodized salt, capsules of iodized oil, or potassium iodide tablets), the iodine dose and frequency (category I: single dose  $\leq 500$  mg/yr; single dose  $\geq 501$  mg/yr; category II: daily intake  $\leq 150$   $\mu$ g; daily intake  $\geq 151$   $\mu$ g), and the duration of the trial (in weeks) were variables that modified the association. A stratified meta-analysis for gender could not be performed because most of the studies included were performed in mixed-gender populations, and data were not available at the individual level or for gender subgroups.

### Statistical data analyses

Data from RCTs were recalculated as an intake-status regression coefficient ( $\beta$ ) and the corresponding SE( $\beta$ ) for each individual study, based on the assumption of a linear relationship on the  $\log_e$ - $\log_e$ -scale (natural logarithm of intake versus natural logarithm of status).<sup>13</sup> Because of the double  $\log_e$  transformation, the overall  $\beta$  represents the difference in the  $\log_e$ -transformed predicted value of biomarker for each one-unit difference in the  $\log_e$ -transformed value in iodine intake. The statistical transformations to obtain  $\beta$  and the SE( $\beta$ )<sup>13</sup> were performed using GenStat version 13-SP2 (Hempstead, UK: VSN International Ltd.). Meta-analysis was carried out with RevMan 4.2 software (Copenhagen: The Nordic Cochrane Centre, The Cochrane Collaboration, 2008) using a random-effects model with statistical significance defined as  $P < 0.05$ . Prespecified potential factors that could modify the association were explored using stratified random-effects meta-analyses. Heterogeneity (expressed as  $I^2$ ) was used to assess the variability between studies.

## RESULTS

The flow diagram of studies assessed and excluded at various stages of the review is presented in Figure 1. The electronic literature search of iodine intake or status yielded 4,805 references. Another 41 references were found by additional reference list searches. After removing duplicates, 4,111 titles and abstracts were screened, and of these, 219 studies appeared potentially relevant and were assessed as full-text papers. Fifty-eight papers for all population groups fulfilled the inclusion and exclusion criteria.<sup>33–90</sup> Of these, 33 were RCTs, in which sample sizes ranged from 30 to 646 participants.<sup>33–65</sup> Further details of included studies are presented in Table 1 and in the Supporting Information for this article, available online (Table S2). Three RCTs were judged to be at low risk of bias, three were judged to be at moderate risk of bias, and 27 were judged to be at a high risk of bias. The most common reasons for high risk of bias were inadequate information on study funding and lack of adequate sequence generation and/or allocation.

Thirty observational studies on iodine intake and status in different population groups were selected.<sup>66–90</sup> Five RCT intervention studies in pregnant women were included as observational studies in the infants of those women. Participants were infants (9 cross-sectional studies, 1 prospective cohort study, 1 nested case-control study), children and adolescents (2 cross-sectional studies, 5 prospective cohort studies), adults and elderly (6 cross-sectional studies, 2 prospective cohort studies), and pregnant and lactating women (4 cross-sectional studies, 2 prospective cohort studies). Two observational studies included both pregnant women and their infants as population groups but did not report the data required to obtain the  $\beta$  coefficients, and these data could not be obtained from the authors. The 30 observational studies included 28,326 subjects in total, with sample sizes ranging from 30 to 4,616 subjects (see Table S2, available in the Supporting Information online). Eleven studies were judged to have a moderate risk of bias, and 14 observational studies were judged to have a high risk of bias. The most common reasons for high risk of bias in observational studies were lack of adequate sequence generation and lack of allocation.

### Iodine intake and urinary iodine

*Evidence from RCTs in children and adolescents.* Thirteen RCTs<sup>33–45</sup> that assessed iodine intake and UI in children and adolescents were identified. Two papers reported data for boys and girls separately,<sup>33,34</sup> two studies had two separate iodine intervention dose groups,<sup>39,44</sup> and two studies had three iodine-treated dose groups<sup>35,41</sup>; therefore, 21 estimates were included in the analysis. These 21

**Table 1 General characteristics of randomized controlled trials ( $n = 33$ ) reporting the effect of dietary iodine intake on urinary iodine, thyroid-stimulating hormone, and thyroglobulin in different population groups.**

| Reference                                            | Country     | Population characteristics<br>No. included<br>Age or age range                                              | Study design and risk of bias<br>Duration of follow-up for<br>single dose or duration of daily<br>supplementation | Iodine intake dose and<br>characteristics of treatment<br>groups                                                                                                                                                                                     | Iodine status<br>biomarker | Analytic methods                                           |
|------------------------------------------------------|-------------|-------------------------------------------------------------------------------------------------------------|-------------------------------------------------------------------------------------------------------------------|------------------------------------------------------------------------------------------------------------------------------------------------------------------------------------------------------------------------------------------------------|----------------------------|------------------------------------------------------------|
| Abuye et al.<br>(1995) <sup>33</sup>                 | Ethiopia    | Schoolchildren with severe ID;<br>goiter rate = 69%<br>$n = 147$<br>4–16 yrs                                | RCT-2; high risk of bias<br>Follow-up: 40 wks                                                                     | Capsules, single dose (mg/day): 400<br>mg iodine vs 200 mg iodized oil<br>Control group, low-dose iodine<br>capsules: boys ( $n = 34$ ), girls ( $n = 33$ )<br>Intervention group, iodine capsules:<br>boys ( $n = 34$ ), girls ( $n = 33$ )         | 1. UI                      | 1. Chloric acid digestion<br>(Sandell-Kolthoff reaction)   |
| Benmiloud et al.<br>(1994) <sup>35</sup>             | Algeria     | Schoolchildren with severe ID<br>in endemic goiter area<br>$n = 182$<br>6–11 yrs                            | RCT-2; high risk of bias<br>Follow-up: 46 wks                                                                     | Capsules, single dose (mg/day): 120<br>mg iodine vs 240 mg iodine vs 480<br>mg iodine vs 960 mg iodized oil<br>Control group, low-dose iodine<br>capsules: ( $n = 36$ )<br>Intervention groups: I ( $n = 36$ ), II<br>( $n = 33$ ), III ( $n = 28$ ) | 1. UI<br>2. Tg<br>3. TSH   | 1. Automated Technicon<br>AutoAnalyzer<br>2. RIA<br>3. RIA |
| Bautista et al.<br>(1991) <sup>34</sup>              | Bolivia     | Schoolchildren with severe ID<br>and goiter<br>$n = 200$<br>5–12 yrs                                        | RCT-1; double-blind, high risk<br>of bias<br>Follow-up: 88 wks                                                    | Capsules, single dose (mg/day): I 475<br>mg iodized oil<br>Placebo group: boys ( $n = 44$ ), girls<br>( $n = 50$ )<br>Intervention group: boys ( $n = 45$ ), girls<br>( $n = 50$ )                                                                   | 1. UI<br>2. Tg<br>3. TSH   | 1. Acid digestion (Ce/As<br>method)<br>2. RIA<br>3. RIA    |
| Furnée et al.<br>(2000) <sup>36</sup>                | Malawi      | Schoolchildren with severe ID<br>$n = 230$<br>5–12 yrs                                                      | RCT-1; double-blind, high risk<br>of bias<br>Follow-up: 40 wks                                                    | Capsules, single dose (mg/day): I<br>490 mg iodized oil<br>Placebo group: ( $n = 33$ )<br>Intervention group: ( $n = 197$ )                                                                                                                          | 1. UI                      | 1. Chloric acid digestion<br>(Sandell-Kolthoff reaction)   |
| Gordon et al.<br>(2009) <sup>37</sup>                | New Zealand | Schoolchildren with mild ID<br>$n = 184$<br>10–13 yrs                                                       | RCT-1; double-blind, low risk<br>of bias<br>Length of daily intervention:<br>28 wks                               | Tablets: 150 µg I/day as KI<br>Placebo group: ( $n = 87$ )<br>Intervention group: ( $n = 89$ )                                                                                                                                                       | 1. UI<br>2. Tg             | 1. Ammonium-persulfate<br>method<br>2. RIA                 |
| Hintze et al.<br>(1988) <sup>39</sup>                | Germany     | Schoolchildren in endemic<br>goiter area with moderate<br>ID and goiter vs no goiter<br>$n = 334$<br>10 yrs | RCT-1; high risk of bias<br>Length of daily intervention:<br>192 wks                                              | Iodized salt: 100 µg/day<br>Control group, noniodized salt:<br>( $n = 124$ )<br>Intervention group: ( $n = 96$ )<br>Control group, noniodized salt, with<br>goiter: ( $n = 36$ )<br>Intervention group, with goiter:<br>( $n = 30$ )                 | 1. UI                      | 1. Automated Technicon<br>AutoAnalyzer                     |
| Huda & Grantham-<br>McGregor<br>(2001) <sup>38</sup> | Bangladesh  | Schoolchildren with severe ID<br>and goiter<br>$n = 305$<br>10–13 yrs                                       | RCT-1; double-blind, low risk<br>of bias<br>Follow-up: 16 wks                                                     | Capsules, single dose (mg/day): I<br>400 mg iodized oil<br>Placebo group: ( $n = 148$ )<br>Intervention group: ( $n = 152$ )                                                                                                                         | 1. UI<br>2. TSH            | 1. Acid digestion (Ce/As<br>method)<br>2. IRMA             |
| Leisner et al.<br>(1985) <sup>60</sup>               | Germany     | Schoolchildren in endemic<br>goiter area<br>$n = 195$<br>5–17 yrs                                           | RCT-1; high risk of bias<br>Length of daily intervention:<br>8 mo                                                 | Tablets: 100 µg I/day as KI<br>Control group: ( $n = 21$ )<br>Intervention group: ( $n = 66$ )                                                                                                                                                       | 1. TSH                     | 1. RIA                                                     |



Table 1 Continued

| Reference                                    | Country          | Population characteristics<br>No. included<br>Age or age range                       | Study design and risk of bias<br>Duration of follow-up for<br>single dose or duration of daily<br>supplementation | Iodine intake dose and<br>characteristics of treatment<br>groups                                                                                                                                                                                                         | Iodine status<br>biomarker | Analytic methods                                                                                     |
|----------------------------------------------|------------------|--------------------------------------------------------------------------------------|-------------------------------------------------------------------------------------------------------------------|--------------------------------------------------------------------------------------------------------------------------------------------------------------------------------------------------------------------------------------------------------------------------|----------------------------|------------------------------------------------------------------------------------------------------|
| Malone et al.<br>(1996) <sup>61</sup>        | Tanzania         | Schoolchildren in endemic<br>goiter area<br><i>n</i> = 152<br>6–17 yrs               | RCT-1; high risk of bias<br>Follow-up: 3 mo                                                                       | Capsules, single dose (mg/day): I 480<br>mg iodized oil, oral vs i.m.<br>Placebo group: ( <i>n</i> = 58)<br>Intervention groups: I ( <i>n</i> = 73), II<br>( <i>n</i> = 71)                                                                                              | 1. TSH                     | 1. IRMA                                                                                              |
| Tajtaková et al.<br>(1998) <sup>40</sup>     | Slovakia         | Schoolchildren in endemic<br>goiter area with mild ID<br><i>n</i> = 646<br>11 yrs    | RCT-1; high risk of bias<br>Length of daily intervention:<br>68 wks                                               | Tablets: 1,530 µg I every 2 wks as KI<br>Placebo group: ( <i>n</i> = 305)<br>Intervention group: ( <i>n</i> = 341)                                                                                                                                                       | 1. UI<br>2. Tg<br>3. TSH   | 1. Chloric acid digestion<br>(Sandell-Kolthoff reaction)<br>2. RIA<br>3. TSH                         |
| Untoro et al.<br>(2006) <sup>41</sup>        | Indonesia        | Schoolchildren in endemic<br>goiter area<br><i>n</i> = 355<br>8–10 yrs               | RCT-2; high risk of bias<br>Follow-up: 12 mo                                                                      | Capsules, single dose (mg/day): I 200<br>vs 400 vs 800 mg iodized oil, oral<br>Placebo group: ( <i>n</i> = 51)<br>Intervention groups: I ( <i>n</i> = 50), II<br>( <i>n</i> = 51), III ( <i>n</i> = 51)                                                                  | 1. UI                      | 1. Chloric acid digestion<br>(Sandell-Kolthoff reaction)                                             |
| van den Briel et al.<br>(2000) <sup>42</sup> | Benin            | Schoolchildren with mild ID<br>in endemic goiter area<br><i>n</i> = 198<br>7–10 yr   | RCT-1; double-blind, high risk<br>of bias<br>Follow-up: 11 mo                                                     | Capsules, single dose (mg/day): I<br>540 mg iodized oil<br>Placebo group: ( <i>n</i> = 98)<br>Intervention group: ( <i>n</i> = 98)                                                                                                                                       | 1. UI<br>2. Tg<br>3. TSH   | 1. Chloric acid digestion<br>(Sandell-Kolthoff reaction)<br>2. RIA<br>3. Immunoluminescence<br>assay |
| van den Briel et al.<br>(2001) <sup>43</sup> | Benin            | School children with mild ID<br>in endemic goiter area<br><i>n</i> = 198<br>7–10 yrs | RCT-1; double-blind, high risk<br>of bias<br>Follow-up: 11 mo                                                     | Capsules, single dose (mg/day): I<br>540 mg iodized oil<br>Placebo group: ( <i>n</i> = 98)<br>Intervention group: ( <i>n</i> = 98)                                                                                                                                       | 1. UI<br>2. Tg<br>3. TSH   | 1. Chloric acid digestion<br>(Sandell-Kolthoff reaction)<br>2. RIA<br>3. Immunoluminescence<br>assay |
| Zimmermann et al.<br>(2006) <sup>45</sup>    | Albania          | Schoolchildren in endemic<br>goiter area with mild ID<br><i>n</i> = 310<br>10–12 yrs | RCT-1; double-blind, low risk<br>of bias<br>Follow-up: 24 wks                                                     | Capsules, single dose (mg/day): I 400<br>mg iodized oil<br>Placebo group: ( <i>n</i> = 146)<br>Intervention group: ( <i>n</i> = 157)                                                                                                                                     | 1. UI<br>2. TSH            | 1. Ammonium persulfate<br>method<br>2. RIA                                                           |
| Zhao et al. (1999) <sup>44</sup>             | China            | Schoolchildren in endemic<br>goiter area with mild ID<br><i>n</i> = 205<br>8–10 yrs  | RCT-1; high risk of bias<br>Follow-up: 24 wks                                                                     | Capsules, single dose (mg/day): I 400<br>mg iodized oil + market salt<br>Tablets: 200 µg I/day as KI<br>Control group, distributed salt: ( <i>n</i> = 69)<br>Intervention group: I ( <i>n</i> = 68), II<br>( <i>n</i> = 68)                                              | 1. UI                      | 1. Acid digestion (Ce/As<br>method)                                                                  |
| Gardner et al.<br>(1988) <sup>46</sup>       | United<br>States | Adults in non ID area<br><i>n</i> = 30<br>22–40 yrs                                  | RCT-2; high risk of bias<br>Length of daily intervention:<br>2 wks                                                | Tablets: I 500 vs 1,500 vs 4,500 µg<br>I/day as KI in water<br>Control group: low-dose KI tablets<br>( <i>n</i> = 9)                                                                                                                                                     | 1. UI<br>2. TSH            | 1. N/A<br>2. RIA                                                                                     |
| Elnagar et al.<br>(1995) <sup>47</sup>       | Sudan            | Adults with goiter<br><i>n</i> = 117<br>~21 yrs                                      | RCT-2; high risk of bias<br>Follow-up: 1 yr                                                                       | Intervention group: I ( <i>n</i> = 9), II ( <i>n</i> = 9)<br>Capsules, single dose (mg/day): I 200<br>vs 400 vs 800, iodized oil, oral<br>Control group, low-dose iodine<br>capsules: ( <i>n</i> = 41)<br>Intervention group: I ( <i>n</i> = 37), II<br>( <i>n</i> = 39) | 1. UI<br>2. TSH            | 1. Automated Technicon<br>AutoAnalyzer<br>2. RIA                                                     |

|                                          |               |                                                                          |                                                                         |                                                                                                                                                                                                                                                                                                                     |                                                                                                        |                                                                    |
|------------------------------------------|---------------|--------------------------------------------------------------------------|-------------------------------------------------------------------------|---------------------------------------------------------------------------------------------------------------------------------------------------------------------------------------------------------------------------------------------------------------------------------------------------------------------|--------------------------------------------------------------------------------------------------------|--------------------------------------------------------------------|
| Kahaly et al. (1997) <sup>48</sup>       | Germany       | Adults in endemic goiter area<br><i>n</i> = 62<br>20–32 yrs              | RCT-1; high risk of bias<br>Length of daily intervention:<br>26 wks     | Tablets: 200 µg I/day as KI<br>Placebo group: ( <i>n</i> = 31)<br>Intervention group: ( <i>n</i> = 31)                                                                                                                                                                                                              | 1. UI<br>2. TSH<br>3. Tg                                                                               | 1. Acid digestion (Ce/As method)<br>2. RIA<br>3. RIA               |
| Kahaly et al. (1998) <sup>49</sup>       | Germany       | Adults in endemic goiter area<br><i>n</i> = 62<br>19–50 yrs              | RCT-1; high risk of bias<br>Length of daily intervention:<br>26 wks     | Tablets: 500 µg I/day as KI<br>Placebo group: ( <i>n</i> = 31)<br>Intervention group: ( <i>n</i> = 31)                                                                                                                                                                                                              | 1. UI<br>2. TSH<br>3. Tg                                                                               | 1. Acid digestion (Ce/As method)<br>2. RIA<br>3. RIA               |
| Paul et al. (1988) <sup>50</sup>         | United States | Adults in non ID area<br><i>n</i> = 32<br>23–56 yrs                      | RCT-2; high risk of bias<br>Length of daily intervention:<br>2 wks      | Tablets: 250 vs 500 vs 1,500 I µg I/day as KI in water<br>Control group, low-dose KI tablets: ( <i>n</i> = 9)<br>Intervention group: I ( <i>n</i> = 9), II ( <i>n</i> = 9)<br>Capsules, single dose (mg/day): I 480 mg iodized oil, oral<br>Control group: ( <i>n</i> = 19)<br>Intervention group: ( <i>n</i> = 19) | 1. UI<br>2. TSH                                                                                        | 1. Ammonium persulfate method<br>2. RIA                            |
| Phillips et al. (1988) <sup>51</sup>     | Zaire         | Adults with severe ID in endemic goiter area<br><i>n</i> = 38<br>~21 yrs | RCT-1; high risk of bias<br>Length of daily intervention:<br>2 yrs      | Capsules, single dose (mg/day): I 480 mg iodized oil, oral<br>Control group: ( <i>n</i> = 19)<br>Intervention group: ( <i>n</i> = 19)                                                                                                                                                                               | 1. UI                                                                                                  | 1. Ammonium persulfate method                                      |
| Reinhardt et al. (1993) <sup>62</sup>    | Germany       | Healthy adults with mild ID<br><i>n</i> = 24<br>23–42 yrs                | RCT-1; high risk of bias<br>Length of daily intervention:<br>4 wks      | Tablets: 500 µg I/day as KI<br>Placebo group: ( <i>n</i> = 16)<br>Intervention group: ( <i>n</i> = 8)                                                                                                                                                                                                               | 1. TSH<br>2. Tg                                                                                        | 1. IRMA<br>2. Immunoluminescence assay                             |
| Tonglet et al. (1992) <sup>52</sup>      | Zaire         | Adults with goiter<br><i>n</i> = 75<br>>15 yrs                           | RCT-2; high risk of bias<br>Follow-up: 12 mo                            | Capsules, single dose (mg/day): I 470 vs 118 mg iodized oil, oral<br>Intervention groups: I ( <i>n</i> = 22), II ( <i>n</i> = 22)                                                                                                                                                                                   | 1. UI<br>2. TSH                                                                                        | 1. Automated Technicon AutoAnalyzer<br>2. RIA                      |
| Antonangeli et al. (2002) <sup>53</sup>  | Italy         | Pregnant women with mild ID<br><i>n</i> = 67<br>20–38 yrs                | RCT-2; high risk of bias<br>Length of daily intervention:<br>11 wks     | Tablets: 200 µg iodide/day vs 50 µg iodide/day<br>Control group, low-dose iodine capsules: ( <i>n</i> = 32)<br>Intervention group: ( <i>n</i> = 35)                                                                                                                                                                 | 1. UI<br>2. TSH<br>Measured:<br>I: 29–33 wks<br>gestation<br>II: 3 mo postpartum                       | 1. Automated Technicon AutoAnalyzer<br>2. IRMA                     |
| Glinier et al. (1995) <sup>54</sup>      | Belgium       | Pregnant women with mild ID<br><i>n</i> = 180<br>N/A                     | RCT-1; high risk of bias<br>Length of daily intervention:<br>30 wks     | Tablets: 100 µg I/day as KI<br>Placebo group: ( <i>n</i> = 60)<br>Intervention group: ( <i>n</i> = 60)                                                                                                                                                                                                              | 1. UI<br>2. TSH<br>3. Tg<br>Measured:<br>I: 31.9 ± 0.2 wks<br>gestation<br>II: 40 ± 0.1 wks postpartum | 1. Automated Technicon AutoAnalyzer<br>2. IRMA<br>3. IRMA          |
| Liesenkotter et al. (1996) <sup>55</sup> | Germany       | Pregnant women with mild ID<br><i>n</i> = 108<br>21–40 yrs               | RCT-1; high risk of bias<br>Length of daily intervention:<br>30 wks     | Tablets: 230 µg I/day as KI<br>Intervention group: ( <i>n</i> = 38)<br>Control group: ( <i>n</i> = 70)                                                                                                                                                                                                              | 1. UI<br>2. TSH<br>3. Tg<br>Measured:<br>2–10 days postpartum                                          | 1. Ce/As method (Sandell-Kolthoff reaction)<br>2. DELFIA<br>3. RIA |
| Nohr & Laurberg (2000) <sup>63</sup>     | Denmark       | Pregnant women<br><i>n</i> = 66<br>24–30 yr                              | RCT-1; moderate risk of bias<br>Length of daily intervention:<br>14 wks | Multivitamin tablets: 150 µg I/day<br>Control group: ( <i>n</i> = 24)<br>Intervention group: ( <i>n</i> = 42)                                                                                                                                                                                                       | 1. TSH<br>2. Tg<br>Measured:<br>35 wks gestation                                                       | 1. Immunoluminescence assay<br>2. Immunoluminescence assay         |

Table 1 Continued

| Reference                               | Country           | Population characteristics<br>No. included<br>Age or age range            | Study design and risk of bias<br>Duration of follow-up for<br>single dose or duration of daily<br>supplementation | Iodine intake dose and<br>characteristics of treatment<br>groups                                            | Iodine status<br>biomarker                                                                     | Analytic methods                                                                                        |
|-----------------------------------------|-------------------|---------------------------------------------------------------------------|-------------------------------------------------------------------------------------------------------------------|-------------------------------------------------------------------------------------------------------------|------------------------------------------------------------------------------------------------|---------------------------------------------------------------------------------------------------------|
| Nohr et al. (2000) <sup>64</sup>        | Denmark           | Lactating women<br>n = 144<br>24–30 yrs                                   | RCT-1; moderate risk of bias<br>Length of daily intervention:<br>30 wks                                           | Multivitamin tablets: 150 µg I/day<br>Control group: (n = 954)<br>Intervention group: (n = 49)              | 1. TSH<br>2. Tg<br>Measured:<br>5 days<br>postpartum                                           | 1. Immunoluminescence<br>assay<br>2. Immunoluminescence<br>assay                                        |
| Pedersen et al.<br>(1993) <sup>56</sup> | Denmark           | Pregnant women with mild ID<br>n = 54<br>24–29 yrs                        | RCT-1; high risk of bias<br>Length of daily intervention:<br>30 wks                                               | Tablets: 1200 µg/day as KI<br>Control group: (n = 28)<br>Intervention group: (n = 28)                       | 1. UI<br>2. TSH<br>3. Tg<br>Measured:<br>I: 37 wks<br>gestation<br>II: 2–10 days<br>postpartum | 1. Acid digestion (Ce/As<br>method)<br>2. RIA<br>3. Immunoluminescence<br>assay                         |
| Reinhard et al.<br>(1998) <sup>57</sup> | Germany           | Lactating women with mild<br>ID<br>n = 70<br>17–41 yrs                    | RCT-2; high risk of bias<br>Length of daily intervention:<br>32 wks                                               | Tablets: 50 µg iodine/day vs 250 µg<br>I/day<br>Control group: (n = 34)<br>Intervention group: (n = 36)     | 1. UI<br>2. TSH<br>3. Tg<br>Measured:<br>5 days<br>postpartum                                  | 1. Acid digestion (Ce/As<br>method)<br>2. Immunoluminescence<br>assay<br>3. Immunoluminescence<br>assay |
| Romano et al.<br>(1991) <sup>58</sup>   | Italy             | Pregnant women in endemic<br>goiter area with mild ID<br>n = 35<br>21 yrs | RCT-1; high risk of bias<br>Length of daily intervention:<br>36 wks                                               | Iodized salt (120–180 µg I/day)<br>Control group: (n = 18)<br>Intervention group: (n = 17)                  | 1. UI<br>Measured:<br>third<br>trimester of<br>pregnancy                                       | 1. Riley & Gochman method<br>(Technicon AutoAnalyzer)                                                   |
| Silva & Silva<br>(1981) <sup>59</sup>   | Chile             | Pregnant women with<br>moderate ID<br>n = 46<br>17–41 yrs                 | RCT-1; high risk of bias<br>Tablets: 1300 µg/day as KI<br>Length of daily intervention:<br>4–16 wks               | Tablets: 1300 µg/day as KI<br>Control group: (n = 10)<br>Intervention group: (n = 36)                       | 1. UI<br>2. TSH<br>Measured:<br>different<br>gestational<br>ages                               | 1. Acid digestion (Ce/As<br>method)<br>2. RIA                                                           |
| Rogahn et al.<br>(2000) <sup>65</sup>   | United<br>Kingdom | Premature infants<br>n = 62 females, N = 59 males<br><33 wks of gestation | RCT-2; moderate risk of bias<br>Length of daily intervention:<br>40 wks                                           | 272 vs 68 µg I/L milk formula<br>Control group, lower I: (n = 60)<br>Intervention group, higher I: (n = 61) | 1. TSH<br>2. Tg                                                                                | 1. chemoluminescence<br>assay<br>2. chemoluminescence<br>assay                                          |

Abbreviations: Ce/As method, reduction of ceric ion by the oxidation of arsenite ion after acidic digestion method; DBS, dried blood spot; DELFIA, immunofluorometric assay; I, iodine; i.m., intramuscularly; IRMA, immunoradiometric assay; KI, potassium iodide; N/A, no answer; RCT-1, randomized controlled trial with placebo; RCT-2, randomized controlled trial with low-dose iodine supplement; RIA, radioimmunoassay; Tg, thyroglobulin; TSH, thyroid-stimulating hormone; UI, urinary iodine; UIE, urinary iodine excretion.  
Criteria by WHO/UNICEF/ICCIDD<sup>67</sup> were used to classify the severity of IDD in the population. For thyroid volumes and goiter, the classification is based on the prevalence of the condition: mild, 5–19.9%; moderate, 20–29.9%; and severe, >30%. For the median urinary iodine, the classification is as follows: mild, 50–99 µg/L; moderate µg/L; and severe, <20 µg/L.



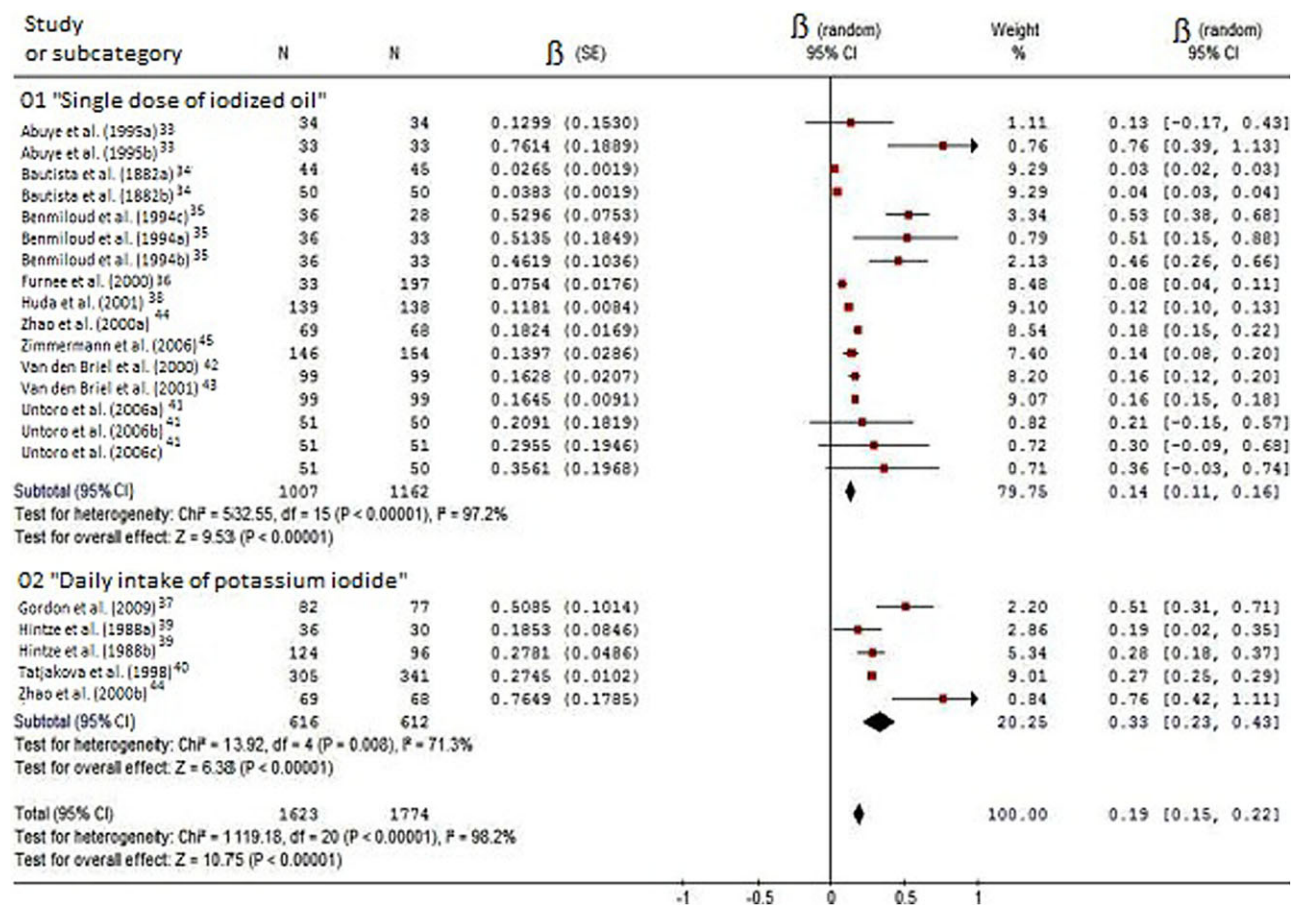

**Figure 2 Primary analysis of urinary iodine (µg/L) in children and adolescents.** β (random) values represent the regression coefficients for the linear association between log-transformed iodine intake and log-transformed urinary iodine excretion.

Abbreviations: CI, confidence interval; df, degrees of freedom; SE, standard error.

estimates included a total of 3,397 participants with an age range of 4 to 16 years (Table 1). The median duration of the included studies was 12 weeks (range, 2–192 weeks). In four RCTs,<sup>37,39,40,44</sup> iodine supplements were given in the form of potassium iodide, in doses that ranged from 100 to 1,500 µg/day. Iodized oil supplementation was used in 10 RCTs,<sup>33–36,38,41–45</sup> with doses ranging from 120 to 960 mg/day.

Combining the 21 estimates of RCTs provided an overall pooled β coefficient of 0.19 (95%CI: 0.15–0.22; 3,397 participants, I<sup>2</sup> = 98%) (Figure 2, Table 2). Therefore, an overall β of 0.19 means that, for every doubling in iodine intake, the difference in UI concentration increases 2<sup>β</sup>-fold or by 14%, since 2<sup>0.19</sup> = 1.14. A stratified meta-analysis on the basis of 16 RCT estimates using a single dose of iodized oil yielded an overall β of 0.14 (95%CI: 0.11–0.16; I<sup>2</sup> = 97%). A stratified meta-analysis on five RCT estimates using a daily dose of potassium iodide yielded an overall β of 0.33 (95%CI: 0.23–0.43; I<sup>2</sup> = 71%) (see Table 2 and Figure 2). This means that chil-

dren who receive an annual dose of iodized oil of 1,000 mg/yr have a UI excretion that is 2<sup>0.14</sup> (1.10-fold) or 10% higher than that in children who receive an annual dose of 500 mg/yr. However, in studies that investigated a daily dose of potassium iodide, the difference in UI concentration is 2<sup>β</sup> (i.e., 2<sup>0.33</sup> = 1.26), or 26%. Thus, children with an iodine intake of 150 µg/day have a UI concentration that is 26% higher than that in children who have a iodine intake of 75 µg/day.

**Evidence from RCTs in adults and the elderly.** Seven RCTs<sup>46–52</sup> on iodine intake and UI in adults and the elderly (646 participants) were included in the review. Four studies<sup>46,47,50,52</sup> had two groups treated with different doses of iodine; therefore, 11 estimates were included in the analysis. Combining the seven RCTs in one meta-analysis provided an overall pooled β coefficient of 0.65 (95%CI: 0.39–0.90; I<sup>2</sup> = 98%), which corresponded to a 2<sup>0.65</sup> or 1.57-fold increase in UI (Table 2 and Figure 3). A stratified analysis yielded an overall β of 0.07 (95%CI:

**Table 2 Stratification of the systematic review, along with results of subgrouping meta-analyses for urinary iodine, serum thyroid-stimulating hormone, and serum thyroglobulin (RCTs for all population groups).**

| Population group                                                  | Urinary iodine                              |               |                   |                   |       | Serum thyroid-stimulating hormone           |               |                   |                   |       | Serum thyroglobulin                         |               |                   |                   |       |
|-------------------------------------------------------------------|---------------------------------------------|---------------|-------------------|-------------------|-------|---------------------------------------------|---------------|-------------------|-------------------|-------|---------------------------------------------|---------------|-------------------|-------------------|-------|
|                                                                   | No. of estimates of RCT/no. of participants | $\beta$ value | Lower limit 95%CI | Upper limit 95%CI | $I^2$ | No. of estimates of RCT/no. of participants | $\beta$ value | Lower limit 95%CI | Upper limit 95%CI | $I^2$ | No. of estimates of RCT/no. of participants | $\beta$ value | Lower limit 95%CI | Upper limit 95%CI | $I^2$ |
| Children and adolescents <sup>a</sup>                             |                                             |               |                   |                   |       |                                             |               |                   |                   |       |                                             |               |                   |                   |       |
| Single dose of iodized oil (200–500 mg) <sup>33–38,41–44</sup>    | 16/2,169                                    | 0.14          | 0.11              | 0.16              | 97%   | 8/1,039                                     | 0.02          | 0.01              | 0.09              | 0%    | 5/498                                       | –0.04         | –0.10             | 0.03              | 91%   |
| Daily dose of potassium iodide (100–200 µg) <sup>37–40,44</sup>   | 5/1,228                                     | 0.33          | 0.23              | 0.43              | 71%   | 3/184                                       | –0.14         | –0.34             | 0.06              | 92%   | 3/261                                       | 0.00          | –0.24             | –0.24             | 85%   |
| Combined analysis                                                 |                                             | 0.19          | 0.15              | 0.22              | 98%   |                                             | –0.00         | –0.02             | 0.03              | 70%   |                                             | –0.02         | –0.08             | 0.03              | 88%   |
| Adults and elderly <sup>b</sup>                                   |                                             |               |                   |                   |       |                                             |               |                   |                   |       |                                             |               |                   |                   |       |
| Single dose of iodized oil (200–500 mg) <sup>47,51,52</sup>       | 5/446                                       | 0.07          | 0.03              | 0.10              | 14%   | 4/408                                       | –0.08         | –0.15             | –0.01             | 0%    |                                             |               |                   |                   |       |
| Daily dose of potassium iodide (250–1,500 µg) <sup>46,48–50</sup> | 6/200                                       | 0.98          | 0.64              | 1.32              | 94%   | 7/224                                       | 0.11          | 0.06              | 0.16              | 0%    | 3/144                                       | –0.23         | –0.50             | 0.03              | 59%   |
| Combined analysis                                                 |                                             | 0.65          | 0.39              | 0.90              | 98%   |                                             | 0.03          | –0.05             | 0.12              | 60%   |                                             |               |                   |                   |       |
| Pregnant and lactating women <sup>c,d</sup>                       |                                             |               |                   |                   |       |                                             |               |                   |                   |       |                                             |               |                   |                   |       |
| Daily dose of potassium iodide: (100–300 µg) <sup>53–59</sup>     |                                             |               |                   |                   |       |                                             |               |                   |                   |       |                                             |               |                   |                   |       |
| Pregnancy                                                         | 7/430                                       | 0.86          | 0.62              | 1.10              | 78%   | 6/461                                       | –0.18         | –0.36             | 0.00              | 78%   | 5/415                                       | –0.54         | –0.78             | –0.32             | 48%   |
| After delivery                                                    | 4/291                                       | 0.27          | –0.04             | 0.58              | 78%   | 5/335                                       | 0.02          | –0.39             | 0.44              | 95%   | 5/434                                       | –0.38         | –0.82             | –1.08             | 89%   |
| Combined analysis                                                 |                                             | 0.62          | 0.38              | 0.86              | 88%   |                                             | –0.13         | –0.27             | 0.11              | 90%   |                                             | –0.60         | –0.70             | –0.49             | 86%   |

Abbreviations: CI, confidence interval; RCT, randomized controlled trial.

<sup>a</sup> For every doubling in iodine intake, the difference in UI increases 2β-fold or by 14% in the case of the exponentiated value of 0.19 = 1.14.

<sup>b</sup> For every doubling in iodine intake, the difference in UI increases 2β-fold or by 57% in the case of the exponentiated value of 0.65 = 1.57.

<sup>c</sup> For every doubling in iodine intake, the difference in UI increases 2β-fold or by 52% in the case of the exponentiated value of 0.62 = 1.57.

<sup>d</sup> For every doubling in iodine intake, the difference in thyroglobulin decreased 2β-fold or by 31% in the case of the exponentiated value of –0.60 = 1.57.

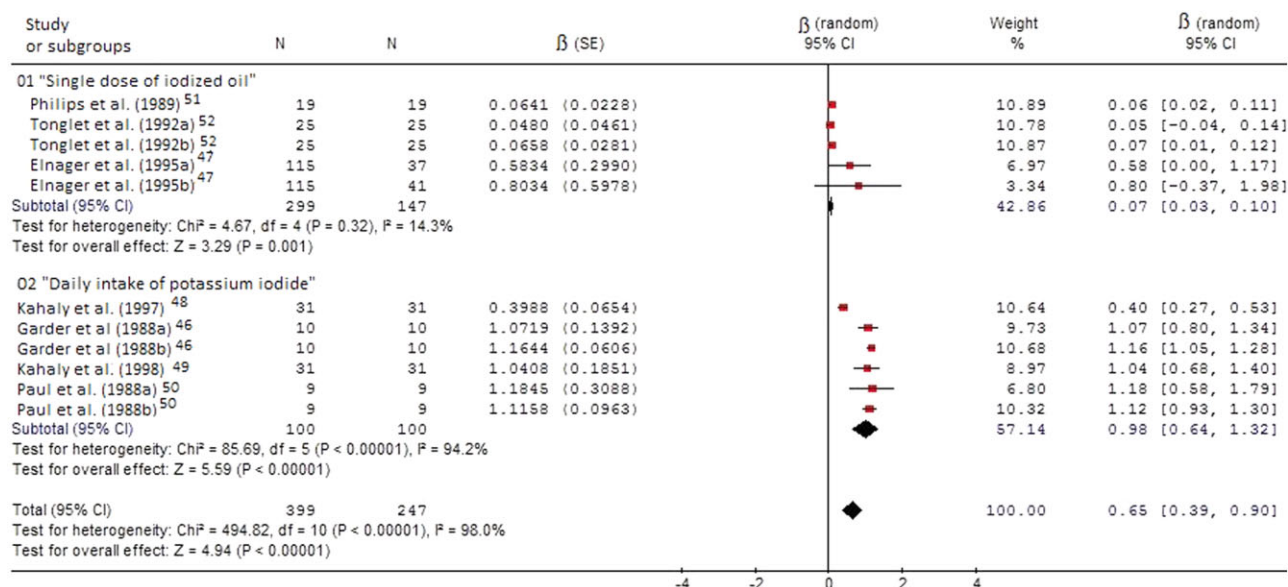

**Figure 3 Primary analysis of urinary iodine (µg/L) in adults and the elderly.** β (random) values represent the regression coefficients for the linear association between log-transformed iodine intake and log-transformed urinary iodine excretion. Abbreviations: CI, confidence interval; df, degrees of freedom; SE, standard error.

0.03–0.10; 446 participants,  $I^2 = 14.3\%$ ) for studies using a single dose of iodized oil (5 estimates of RCTs) and an overall β of 0.98 (95%CI: 0.64–1.32; 200 participants,  $I^2 = 94\%$ ) for studies using a daily dose of iodine (6 estimates of RCTs), i.e., a 1.05- and 1.97-fold increase in UI, respectively (Table 2). Thus, a subject with an annual intake of iodized oil of 1,000 mg/yr will have a UI excretion that is 5% higher (predicted UI <158 µg/L) than a person who has an iodine intake of 500 mg/yr (predicted UI <150 µg/L) given as a single dose of iodized oil.

**Evidence from RCTs in pregnant and lactating women.** Seven RCTs<sup>53–59</sup> that assessed the daily dose of potassium iodide intake and UI in pregnant and lactating women (470 participants) were included in the review. Combining the seven RCTs in one meta-analysis provided an overall pooled β coefficient of 0.62 (95%CI: 0.38–0.86;  $I^2 = 88.1\%$ ), which corresponded to a  $2^{0.62} = 1.52$ -fold increase in UI (Table 2 and Figure 4). In the subgroup of pregnant women, the pooled β was 0.86 (95%CI: 0.62–1.10; 430 participants,  $I^2 = 78\%$ ) (6 estimates of RCTs), whereas it was 0.27 (95%CI: –0.04–0.58; 291 participants  $I^2 = 78\%$ ,  $P = 0.09$ ) in the subgroup of women in the postnatal period (4 estimates of RCTs), i.e., a 1.84- and 1.20-fold increase in UI, respectively (Table 2 and Figure 4). Thus, in pregnant women with an iodine intake of 200 µg/day in the form of potassium iodide, the UI concentration was 81% higher than in pregnant women with an iodine intake of 100 µg/day, and in the postnatal period, it was 20% higher.

**Observational evidence in all population groups.** Twenty-two observational studies of iodine intake and UI were included.<sup>66–79,81–86,88,89</sup> Participants were infants (2 cross-sectional studies, 1 nested case control study), children and adolescents (2 cross-sectional studies, 5 prospective cohort studies), adults and elderly (6 cross-sectional studies, 1 prospective cohort study), and pregnant and lactating women (4 cross-sectional studies, 1 prospective cohort study) (see Table S2, available in the Supporting Information online). One study presented data for two population groups: pregnant women and their infants. The included observational studies reported iodine intake and iodine biomarker concentrations per category of iodine deficiency. Since these studies did not report the association or correlation between intake and status, it was not possible to estimate the β or the SE(β) for a dose-response meta-analysis. A brief summary of the key results of these observational studies is shown in Table 3.

### Iodine intake and thyroid-stimulating hormone

**Evidence from RCTs in children and adolescents.** Eight RCTs<sup>34–36,42–45,60,61</sup> that assessed iodine intake and TSH concentration in children and adolescents were included. One study reported data for boys and girls separately,<sup>40</sup> and one study had three groups treated with different doses of iodine,<sup>35</sup> so 11 estimates with a total of 1,223 participants were included. The overall pooled β coefficient was 0.00 (95%CI: –0.02–0.03;  $I^2 = 70\%$ ,  $P = 0.88$ )

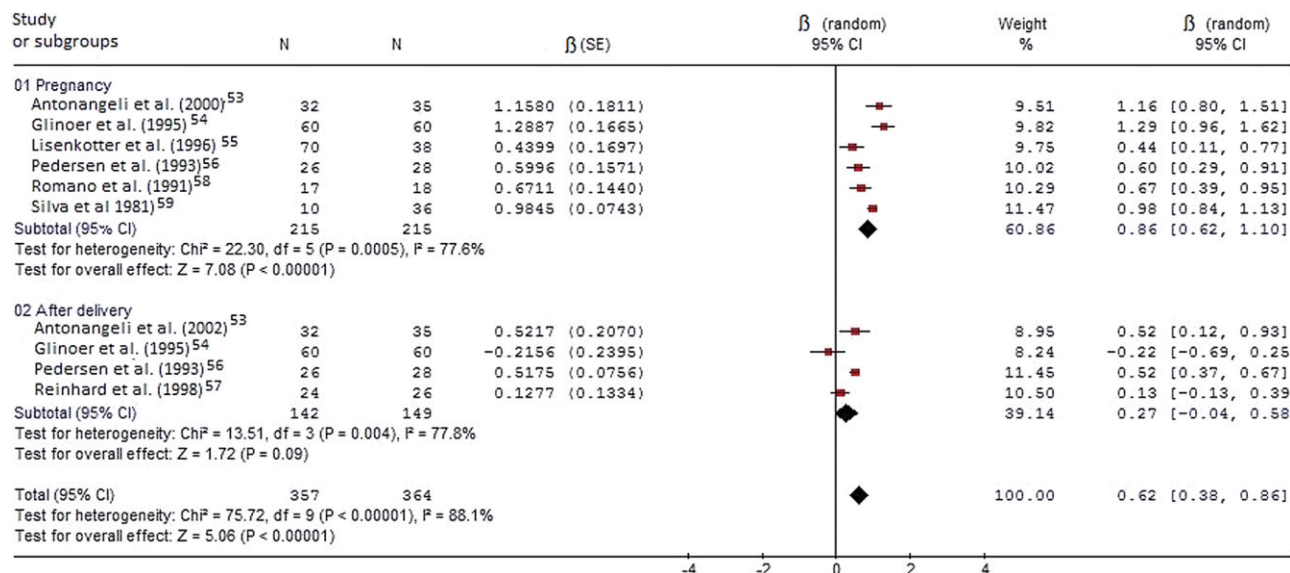

**Figure 4 Primary analysis of urinary iodine (µg/L) in pregnancy and lactating women.** β (random) values represent the regression coefficients for the linear association between log-transformed iodine intake and log-transformed urinary iodine excretion.

**Abbreviations:** CI, confidence interval; df, degrees of freedom; SE, standard error.

(Table 2). A stratified meta-analysis yielded an overall β of 0.02 (95%CI: 0.01–0.03; I<sup>2</sup> = 0%) using a single dose of iodized oil (8 estimates of RCTs, 1,039 participants) and an overall β of −0.14 (95%CI: −0.34–0.06; I<sup>2</sup> = 92%) for a daily dose of iodine (3 estimates of RCTs; 184 participants) (Table 2). An overall β of 0.02 means that, for every doubling in iodine intake, the difference in TSH concentration increases by 1%. An annual dose of iodized oil of 1,000 mg iodine/yr translates to a TSH concentration that is 1% higher than that in a child with an iodine intake of 500 mg in a single dose.

**Evidence from RCTs in adults and the elderly.** Seven RCTs<sup>46–50,52,62</sup> on iodine intake and TSH in adults and elderly (632 participants) were included in this review. Four studies<sup>46,47,50,52</sup> had two groups treated with different doses of iodine; therefore, 11 estimates were included in the analysis. Combining the estimates provided an overall pooled β coefficient of 0.03 (95%CI: −0.05–0.12; I<sup>2</sup> = 60%) (Table 2). A stratified analysis yielded an overall β of −0.08 (95%CI: −0.15 to −0.01; I<sup>2</sup> = 0%) using a single dose of iodized oil (4 estimates of RCTs, 408 participants) and of 0.11 (95%CI: 0.06–0.16; I<sup>2</sup> = 0%) for the daily doses of iodine (7 estimates of RCTs, 224 participants) (Table 1 and 2). Thus, the TSH concentration is decreased by 5% in subjects who receive an annual dose of iodized oil and is increased by 8% in persons who receive a daily dose of iodine in the form of potassium iodide.

**Evidence from RCTs in pregnant and lactating women.** Seven RCTs<sup>53–56,58,59</sup> on iodine intake and TSH

concentration in pregnant and lactating women (511 participants) were included in this review. Combining the seven RCTs in one meta-analysis resulted in an overall pooled β coefficient of −0.13 (95%CI: −0.27–0.01; I<sup>2</sup> = 90%) (Table 2). In the subgroup of pregnant women, the pooled β was −0.18 (95%CI: −0.36–0.00; I<sup>2</sup> = 77%, P < 0.05) (6 estimates of RCTs, 461 participants) during pregnancy and 0.02 (95%CI: −0.39–0.44; I<sup>2</sup> = 95.8%, P = 0.91) in the postnatal period (5 estimates of RCTs, 335 participants) (Table 2). Therefore, daily intake of iodine as potassium iodide, with an overall β of −0.18, results in a decrease in TSH concentration of 12% for every doubling in iodine intake in pregnant women.

**Observational evidence in all population groups.** Nineteen observational studies of iodine intake and TSH (see Table S2, available in the Supporting Information online) were selected for inclusion.<sup>66–68,70–72,75</sup> Participants were infants (7 cross-sectional study, 1 prospective cohort study), children and adolescents (2 cross-sectional studies, 4 prospective cohort studies), adults and elderly (3 cross-sectional studies), and pregnant and lactating women (2 cross-sectional studies) (see Table S2, available in the Supporting Information online). The 19 observational studies included a total of 8,288 participants, with sample sizes ranging from 20 to 1,584 subjects. Since no correlations between iodine intake and status were presented by these studies, a meta-analysis was not possible. A brief summary of iodine intake and TSH levels in different population groups in the observational studies is included in Table 3.



**Table 3 A brief summary of key association of low, adequate, and excess iodine intake and urinary iodine, thyroid-stimulating hormone, and thyroglobulin in 30 observational studies.**

| Reference                                                                                                                                               | Population group | Severity of ID <sup>a</sup>                                | Iodine intake                                                                                                | Results                                                                                            |
|---------------------------------------------------------------------------------------------------------------------------------------------------------|------------------|------------------------------------------------------------|--------------------------------------------------------------------------------------------------------------|----------------------------------------------------------------------------------------------------|
| Simescu et al. (2002) <sup>67</sup> ; Zimmermann et al. (2000) <sup>68</sup>                                                                            | Schoolchildren   | Mild                                                       | 200 mg/single dose; yes vs no supplement use                                                                 | UI 130 µg/L vs UI <40 µg/L                                                                         |
| Ojule & Osotimehin (1998) <sup>90</sup> ; Zimmermann et al. (2005) <sup>71</sup> ; Zimmermann et al. (2006) <sup>72</sup>                               | Schoolchildren   | Mild                                                       | Adequate vs more-than-adequate vs excess intake of iodized salt (>300 µg/day)                                | UI <130 µg/L vs UI >200 µg/L vs UI >700 µg/L                                                       |
| Zimmermann et al. (2003) <sup>69</sup> ; Zimmermann et al. (2004) <sup>70</sup> ; Zimmermann et al. (2006) <sup>72</sup>                                | Schoolchildren   | Severe                                                     | 250 µg/day; yes vs no supplement use                                                                         | UI <180 µg/L vs UI <20 µg/L                                                                        |
| Torheim et al. (2005) <sup>77</sup>                                                                                                                     | Adults           | Severe                                                     | Iodization of salt: <25 ppm vs 25–70 ppm vs >70 ppm                                                          | UI from 34 µg/L to 40 µg/L to 70 µg/L                                                              |
|                                                                                                                                                         | Adults           | Mild                                                       | Before vs after bread fortification; yes vs no supplement use                                                | UI <70 µg/L vs UI >100 µg/L vs UI >200 µg/L                                                        |
| Teng et al. (2006) <sup>76</sup> ; Andersen et al. (2009) <sup>78</sup> ; Laurberg et al. (1998) <sup>79</sup> ; Squatrito et al. (1981) <sup>75</sup>  | Adults           | Mild<br>Moderate                                           | Low (40–60 µg/day), adequate (>100 µg/day), more-than-adequate (>200 µg/day), or higher (>300 µg/day) intake | UI 30–40 µg/L vs UI 130–160 µg/L vs UI 350 µg/L vs UI >600 µg/L                                    |
| Mian et al. (2009) <sup>81</sup> ; Mezzosi et al. (2000) <sup>82</sup> ; Velasco et al. (2009) <sup>86</sup>                                            | Pregnant women   | Moderate                                                   | 150 vs 300 µg/day; yes vs no supplement use                                                                  | UI <100–130 µg/L vs UI 200 µg/L vs UI <20 µg/L                                                     |
| Mian et al. (2009) <sup>81</sup> ; Mezzosi et al. (2000) <sup>82</sup> ; Zimmermann et al. (2005) <sup>84</sup>                                         | Pregnant women   | Moderate <sup>31,32</sup> in areas of non ID <sup>34</sup> | Iodized salt intake: 105 µg/day vs 190 µg/day                                                                | UI <60 µg/L vs UI >100 µg/L                                                                        |
| Simescu et al. (2002) <sup>67</sup> ; Zimmermann et al. (2005) <sup>84</sup>                                                                            | Schoolchildren   | Mild                                                       | 200 mg/single dose; yes vs no supplement use                                                                 | UI from 115 µg/L to 141 µg/L<br>TSH unchanged and TSH ↓ 0.2 mU/L                                   |
| Ojule & Osotimehin (1998) <sup>90</sup>                                                                                                                 | Schoolchildren   | Mild                                                       | Adequate iodized salt intake: >100 µg/day                                                                    | TSH ↓ 0.5 mU/L                                                                                     |
| Zimmermann et al. (2003) <sup>69</sup> ; Zimmermann et al. (2004) <sup>70</sup> ; Zimmermann et al. (2006) <sup>72</sup>                                | Schoolchildren   | Severe                                                     | 250 µg/day; yes vs no supplement use                                                                         | TSH ↑ 0.2–0.4 mU/L after 20-wk intervention<br>TSH ↓ 0.2 mU/L vs baseline after 48-wk intervention |
| Andersen et al. (2009) <sup>78</sup> ; Guan et al. (2008) <sup>80</sup> ; Squatrito et al. (1981) <sup>75</sup>                                         | Adults           | Mild                                                       | More-than-adequate (>200–299 µg/day) or higher (>300 µg/day) intake                                          | TSH at baseline 0.9–1.1 mU/L<br>TSH ↑ 0.2–0.8 mU/L vs TSH ↑ 0.2–0.8 mU/L                           |
| Squatrito et al. (1981) <sup>75</sup>                                                                                                                   | Adults           | Moderate                                                   | Adequate intake: >100 µg/day                                                                                 | TSH at baseline <5 mU/L, TSH ↓ 0.8 mU/L                                                            |
| Velasco et al. (2009) <sup>86</sup> ; Moleti et al. (2008) <sup>83</sup>                                                                                | Pregnant women   | Moderate                                                   | 300 µg/day; yes vs no supplement use<br>Iodized salt intake: 190 µg/day vs 105 µg/day                        | TSH ↓ 0.5 mU/L<br>TSH ↑ 0.3 mU/L                                                                   |
| Simescu et al. (2002) <sup>67</sup>                                                                                                                     | Schoolchildren   | Mild                                                       | 200 mg/single dose of iodized oil; yes vs no supplement use                                                  | Tg ↓ 3.8 ng/L                                                                                      |
| Zimmermann et al. (2004) <sup>70</sup> ; Zimmermann et al. (2006) <sup>72</sup>                                                                         | Schoolchildren   | Severe                                                     | 250 µg/day; yes vs no supplement use                                                                         | Tg ↓ 18–36 ng/L after 20 wks                                                                       |
| Teng et al. (2006) <sup>76</sup> ; Andersen et al. (2009) <sup>78</sup> ; Rasmussen et al. (2002) <sup>73</sup> ; Squatrito et al. (1981) <sup>75</sup> | Adults           | Mild                                                       | Adequate (>100 µg/day) vs more-than-adequate (>200 µg/day) intake                                            | Tg at baseline 6–15 ng/L<br>Tg ↓ 4 ng/L adequate vs ↓ 1.7–7 ng/L >adequate intake                  |
| Laurberg et al. (1998) <sup>79</sup>                                                                                                                    | Adults           | Moderate                                                   | Adequate intake: >100 µg/day                                                                                 | Tg ↑ 6.0.3 ng/L                                                                                    |
| Velasco et al. (2009) <sup>86</sup> ; Moleti et al. (2008) <sup>83</sup>                                                                                | Pregnant women   | Moderate                                                   | 300 µg/day; yes vs no supplement use<br>Iodized salt intake: 190 µg/day vs 105 µg/day                        | Tg ↓ 5.5 ng/L<br>Tg ↓ 4.8.5 ng/L                                                                   |

**Abbreviations:** IDD, iodine deficiency disorder; Tg, thyroglobulin; TSH, thyroid-stimulating hormone; UI, urinary iodine; ↑, increase; ↓, decrease.

<sup>a</sup> Criteria by WHO/UNICEF/ICCIDD<sup>6</sup> were used to classify the severity of IDD in the population. For thyroid volumes and goiter, the classification is based on the prevalence of the condition: mild, 5–19.9%; moderate, 20–29.9%; and severe, >30%. For the median UI, the classification is as follows: mild, 50–99 µg/L; moderate, 20–49 µg/L; and severe, <20 µg/L.

## Iodine intake and thyroglobulin

*Evidence from RCTs in children and adolescents.* Five RCTs<sup>35,37,40,42,43</sup> that assessed iodine intake and Tg were included. One study<sup>40</sup> reported data for boys and girls separately, and one study<sup>35</sup> had three different iodine-treated groups; therefore, eight estimates were included in the analysis. Combining the five RCTs (760 participants) provided an overall pooled  $\beta$  coefficient of  $-0.02$  (95%CI:  $-0.08$ – $0.03$ ;  $I^2 = 88\%$ ,  $P = 0.41$ ) (Table 2). A stratified meta-analysis yielded an overall  $\beta$  of  $-0.04$  (95%CI:  $-0.10$ – $0.03$ ;  $I^2 = 91\%$ ) when based on studies using a single dose of iodized oil (5 estimates of RCTs, 498 participants) and an overall  $\beta$  of  $0.00$  (95%CI:  $-0.24$ – $0.24$ ;  $I^2 = 85\%$ ) when based on studies using a daily dose of potassium iodide (3 estimates of RCTs, 261 participants) (Table 2).

*Evidence from RCTs in adults and the elderly.* Three RCTs<sup>48,49,62</sup> on iodine intake and Tg concentration were included (114 participants). Combining the three estimates of RCTs in one meta-analysis yielded an overall pooled  $\beta$  of  $-0.23$  (95%CI:  $-0.50$ – $0.03$ ;  $I^2 = 59\%$ , 144 participants) (Table 2).

*Evidence from RCTs in pregnant and lactating women.* Seven RCTs<sup>53–57,63,64</sup> on iodine intake and Tg concentrations in pregnant and lactating women (849 participants) were included. Combining the seven RCTs in one meta-analysis yielded an overall pooled  $\beta$  coefficient of  $-0.60$  (95%CI:  $-0.70$  to  $-0.49$ ;  $I^2 = 85\%$ ) (Table 2). In the subgroup of pregnant women, the pooled  $\beta$  was  $-0.54$  (95%CI:  $-0.76$  to  $-0.32$ ;  $I^2 = 48\%$ ) (5 estimates of RCTs, 415 participants), whereas it was  $-0.38$  (95%CI:  $-0.82$ – $0.05$ ;  $I^2 = 89\%$ ,  $P < 0.09$ ) in the subgroup of women in the postnatal period (5 estimates of RCTs, 415 participants) (Table 2). Therefore, daily iodine intake as potassium iodide, with an overall  $\beta$  of  $-0.54$ , results in a decrease in Tg concentration of 31% for every doubling in iodine intake. Thus, in pregnant women with an iodine intake of 200  $\mu\text{g/day}$ , the Tg concentration is 31% lower than that in pregnant women with an iodine intake of 100  $\mu\text{g/day}$ . This corresponds to predicted Tg levels of 10 ng/L and 15 ng/L in pregnant women with intakes of 200  $\mu\text{g/day}$  and 100  $\mu\text{g/day}$ , respectively.

*Observational evidence in all population groups.* Twenty observational studies of iodine intake and Tg were selected for inclusion (see Table S2, available in the Supporting Information online).<sup>53–56,59,69–73,75,76,78–80,83,86–89</sup> Participants were infants (6 cross-sectional studies, 1 prospective cohort study, 1 nested case control study), children and adolescents (3 prospective cohort studies), adults and elderly (4 cross-sectional studies, 2 prospective

cohort studies), and pregnant and lactating women (3 cross-sectional studies). In regions of mild iodine deficiency, four observational studies in adults with baseline Tg levels of 6–15 ng/L showed a decrease in Tg of 4 ng/L when the intake of iodine was adequate ( $>100 \mu\text{g/day}$ ) and a decrease in the range of 1.7–7 ng/L when the intake of iodine was more than adequate ( $>200 \mu\text{g/day}$ )<sup>73,75,76,79</sup>

A brief summary of levels of iodine intake and TSH levels in different population groups is included in Table 3.

## Summary evidence: iodine intake, urinary iodine, thyroid-stimulating hormone, and thyroglobulin in infants

Seven studies<sup>54–59,63,85,86</sup> that reported prenatal iodine intake in relation to iodine biomarkers in infants were included (see Table S2 available in Supporting Information online). Only four of these studies, however, investigated the association between iodine intake and status, which is not sufficient to justify a meta-analysis. Cord blood Tg levels were significantly lower in neonates treated prenatally with 100–200  $\mu\text{g}$  of iodine per day from approximately 14–17 weeks of gestation to term compared with levels in nontreated neonates.<sup>54,56,63</sup> Three studies showed that TSH levels were unaltered in infants treated prenatally with 100–230  $\mu\text{g}$  of iodine per day,<sup>55,56,59</sup> and three studies<sup>54,63,86</sup> (100–300  $\mu\text{g}$  of iodine per day, respectively) described higher TSH levels in the cord blood of neonates born to iodine-treated mothers. UI in neonates, reported in only two studies,<sup>85,86</sup> was higher in infants when mothers were supplemented with iodine during pregnancy. Kurtoglu et al.<sup>89</sup> found no correlation between iodine content in breast milk and UI but found a positive correlation between TSH and estimated dietary intake of iodine.<sup>87,88</sup> TSH, as an indicator of iodine deficiency in infants, was higher in neonates from areas of moderate iodine deficiency than in neonates from areas of adequate iodine intake.<sup>90</sup> An RCT by Roghan et al.<sup>63</sup> did not confirm that increased iodine intake (272  $\mu\text{g/L}$  versus 68  $\mu\text{g/L}$  in milk formula) in preterm infants would improve circulating concentrations of thyroid hormones (Table 1).

## DISCUSSION

This review is the first dose-response meta-analysis on the relationship between iodine intake and biomarkers of iodine excretion and status. RCTs that examined iodine supplementation showed a significant effect of supplementation on all markers of iodine status, and this effect was particularly strong for UI and TSH across all population groups. The dose-response relationship was much stronger for potassium iodide than for other types of



iodine supplements. RCTs that investigated a daily potassium iodide supplement showed an increase in UI concentration in adults (97%), pregnant women (81%), and children (26%). RCTs that investigated serum TSH concentrations in pregnant women showed that doubling the iodine intake as potassium iodide significantly decreased the serum TSH concentration by 12%. This dose-response effect on TSH hormone levels is reflected by the guidance of the Technical Consultation, which proposed an increase in the current Food and Agriculture Organization of the United Nations (FAO)/WHO recommended nutrient intake for iodine during pregnancy from 200 µg/day to 250 µg/day to prevent maternal subclinical hypothyroidism (an increased concentration of TSH in the second trimester).<sup>27,31</sup> In adults, doubling the iodine intake significantly increases the serum TSH concentration by 8% ( $P < 0.005$ ). The dose-response relationship between serum Tg and iodine intake indicates a decrease of 31% in pregnant women (with daily intake) for every doubling of the daily iodine intake. It should be emphasized that serum Tg represents a very sensitive index of thyroid hyperstimulation and reflects iodine deficiency.<sup>11</sup>

Several assumptions were needed to conduct the meta-analyses presented here. For six RCTs, independence of estimates was assumed when two or three intervention groups were compared with the same placebo group. Another option for handling studies with multiple intervention groups would have been to use only one of the intervention groups. A sensitivity study using only one intervention group for each study (the group with the most common dosage) showed similar results (data not shown). Therefore, as much information as possible was included in the current meta-analysis. A further potential limitation that should be considered in interpreting the results is that, in some included studies, the control groups were not given placebo but instead were given a low dose of iodine supplement. Iodine intervention studies are often carried out in areas of severe iodine deficiency, and therefore an RCT with a placebo group receiving no iodine at all would be ethically unfeasible. However, a low-dose control group would reduce, rather than exaggerate, the differences between the intervention and control groups. For RCTs in which there was no indication of habitual iodine intake (above that given as a supplement), an average intake value (100 µg/day) based on median urinary excretion was assigned to the population so that total iodine intake could be compared. Though this introduces a potential source of error, it was agreed that this was a less erroneous way of dealing with the data than to ignore habitual intake entirely and compare only supplemented doses. Iodine intake is difficult to determine by dietary assessment because the iodine content of foods is variable, and reliable values are

not always available in food composition tables. No studies on the relevance of dietary assessment methods for iodine intake in infants, children, and adolescents were identified.<sup>91</sup>

These meta-analyses required transformations of the intake and biomarker data to a common scale, as the studies included had diverse ways of presenting the data and the relationship between intake of iodine and biomarkers of iodine status in urine and blood. Such differences between studies are a challenge when trying to quantitatively summarize the data using conventional methods of meta-analysis. A linear relationship on the double-log<sub>e</sub> scale permitted the pooling of  $\beta$  coefficients and the presentation of these as a dose-response relationship between iodine intake and UI excretion, serum TSH, and serum Tg. As compared with a standard meta-analysis of mean differences between subjects with high versus low exposure, a linear relationship on the double-log<sub>e</sub> scale allows biomarker status levels to be modeled as a nonlinear but monotonic concave function of iodine doses, which is believed to be a more likely shape. The RCTs included in the present meta-analyses differ in follow-up time, study population, supplemental forms of iodine, dose and dose frequency of iodine, and the analytical laboratory methods used to measure UI, serum TSH, and serum Tg. Although these factors were coupled with each study's specific aims and study design, they interfered with the comparison of results and contributed to the large between-study heterogeneity. In the stratified analyses for supplemental forms of iodine, a reduction in the between-study heterogeneity was observed only for the association with the UI concentration in adults (Table 2).

In addition to the evidence from RCTs, data from 30 observational studies were identified and extracted, but they were too heterogeneous to combine in a meta-analysis (see Table S2 available in Supporting Information online). A basic comparison of data from supplemented pregnant women in regions of moderate iodine deficiency shows similarities between the results of RCT meta-analyses and the observational studies. In observational studies, pregnant women with an iodine intake of 150 µg/day had a UI concentration of 100 µg/L to 130 µg/L. In women with intakes of 300 µg/day, the UI concentration was doubled to 200 µg/L. The pooled  $\beta$  from comparable RCTs suggested that UI concentrations were 81% higher in pregnant women supplemented with 300 µg/day versus 150 µg/day. Review analyses of all included observational studies indicated that recommended values for iodine intake should be specific for each individual country due to differences in the prevalence of iodine deficiency.

A recently published paper by Zimmermann and Andersson<sup>9</sup> estimates the prevalence of iodine deficiency

in Europe in 2010 on the basis of a systematic review to update the WHO Vitamin and Mineral Nutrition Information System database.<sup>92</sup> The studies included in the present meta-analysis were checked against the WHO database (<http://www.who.int/vmnis/iodine/data/en/index.html>). Most of the RCTs<sup>33–36,38,39,41–45</sup> included in meta-analyses and relevant cross-selection studies<sup>55,58,59,73–77,79,82,84,89</sup> in the review presented here represent additional references included in the WHO database. Certain studies included here<sup>37,40,44,46–54,56,57,60,72,78,80,81,83,85–90</sup> are not included in the WHO database, probably because they had a low number of participants that would not be sufficient to accurately assess iodine intake in the country. The process of monitoring the prevention of iodine deficiency disorders should include the assessment of iodine status. As demonstrated by the meta-analyses in this review, UI may be the best indicator of WHO-UNICEF-ICCIDD iodine program effectiveness. Assessment of iodine status is necessary to identify iodine deficiency within a nation or region. In some countries, however, implementation of a salt iodization program may not be feasible in all areas. Results from the meta-analyses of RCTs presented here suggest that single-dose iodine supplementation is a good option in areas of severe iodine deficiency where universal salt iodization cannot be rapidly implemented. Overall, analysis of the included studies confirmed UI as an effective biomarker that reflects changes in iodine status and dose response to iodine intake.

The amount of iodine needed to prevent iodine deficiency disorders and to maintain body stores, as well as to reduce the risk of iodine deficiency disorders, is the basis for establishing micronutrient recommendations. This meta-analysis was designed to quantify the dose-response relationship between iodine intake and biomarkers of iodine status. This information is useful for establishing the dose of iodine to recommend for different population groups, especially pregnant women and infants, since fetuses and infants have increased sensitivity to the effects of iodine deficiency during periods of rapid and new growth and are at higher risk of brain damage from iodine deficiency. Healthy women maintain iodine stores of 15–20 mg in the thyroid<sup>1</sup>; during pregnancy, these significant iodine stores can be used to help meet the approximate 50% increase in maternal iodine requirement.

This meta-analyses model for RCTs was carried out within the context of the EURRECA project as a means to provide additional evidence to support reference values for iodine and to contribute evidence to substantiate the daily dose of iodine necessary to maintain normal UI levels or optimal levels of biomarkers for iodine status.<sup>91</sup> The focus of the EURRECA work was micronutrient deficiencies; therefore, less emphasis has been placed on intakes at the upper end of the normal range and into

excess intakes. In some areas of the world, however, higher intakes are an important issue to be considered in establishing the best practice for the usefulness (or adequacy) of biomarkers in assessing intake within a population. Higher intakes are also a key area of concern when setting reference values, as tolerable upper limits are often established in order to prevent the toxicity issues associated with excess intakes. Although iodine is largely the focus of deficiency research at present, it is important that intakes at the other end of the spectrum are not ignored. Perhaps more important in the context of population monitoring is understanding how the relationship between intake and status evolves as populations move from deficiency to adequacy, and how to monitor these changes using the most appropriate biomarkers. The vast majority of studies that were included in this review were conducted in populations with some degree of iodine deficiency (see Table 1 and Table S2, available in the Supporting Information online). Populations were typically classified as having endemic goiter or severe or mild iodine deficiency, with very few deemed to have adequate iodine status and none identified within the higher range of intake/status. This makes interpretation of the intake-status relationship at higher concentrations difficult within the context of this study and perhaps highlights a limitation of this review as well as a gap in the current knowledge. Future research on the relationships between iodine intake, iodine status, and health in infants and the elderly is particularly important, as iodine requirements and health effects in these population groups are presently lacking.<sup>91</sup>

The relationship of UI to iodine intake is relevant to establish dietary requirements for iodine, but as an indicator of iodine intake, the median UI concentration reflects short-term intake and does not provide direct information about thyroid function and longer-term iodine exposure. Serum TSH and Tg concentrations primarily indicate thyroid function, which is largely dependent on iodine intake, as a means of detecting functional iodine deficiency. Serum Tg is easier to assess than thyroid volume measurement. However, reference ranges for tests of thyroid hormones (TSH, free T<sub>4</sub>, Tg) are wide, making it difficult to use such tests to assess iodine status. Biomarkers of iodine status are required to study iodine deficiency disorders in different parts of the world and to evaluate the effects of fortification strategies, but it is inadvisable to rely on a single biomarker to clearly identify iodine deficiency within a population. As the results of this review indicate, certain biomarkers are more reliable and useful in particular population groups, but the aim of this review was not to assess the usefulness or limitations of these markers. This work was previously undertaken within the context of EURRECA and was used to inform the selection of biomarkers for the current

review.<sup>11,12</sup> The previous systematic review found that all of the following appear to be useful biomarkers of iodine status: 1) UI in children and adolescents as well as in general populations with low or moderate baseline iodine status, 2) serum Tg in children and adolescents, and 3) TSH in pregnant and lactating women and in adult females, but not in children and adolescents or in those with moderate baseline TSH status.<sup>12</sup> Normal levels of serum Tg are geographically sensitive, because they are affected by the availability of iodide. In countries where iodine intake is adequate, the reference serum level for Tg in Tg-antibody-negative euthyroid populations is approximately 3–40 ng/mL, using analytical standards.<sup>93</sup> Both the mean level of Tg in a population and the upper reference limit of Tg can be increased relative to the degree of iodine deficiency in iodine-deficient countries. The meta-analyses presented here showed a dose-response effect between iodine intake and decreased serum Tg and in pregnant women, a finding that is relevant for programs that aim to eliminate iodine deficiency disorders.

## CONCLUSION

The principal aim of this review was to use the meta-analyses model to provide an estimate of the dose-response relationship between iodine intake and biomarkers of iodine status. The dose-response regression indicated that, in the dose range of 120–500 µg/day, doubling the daily intake of potassium iodide increased the UI by 1.97-fold (97%) in adults, by 1.81-fold (81%) in pregnant women, and, though less strong, by 1.26-fold (26%) in children. For TSH concentrations, the data indicated a 1.08-fold (8%) increase for every doubling of intake in the adult population and a 0.88-fold decrease in pregnant women. Pooled estimates obtained for Tg indicated a 31% decrease in this biomarker in pregnant women when the daily dose of iodine was doubled. Further RCTs are required to examine target serum and urinary biomarker concentrations in relation to thyroid function, a broader range of intakes of iodine within the population groups, and interindividual variability. The model of dose-response used to describe the relationship between iodine intake and status in this review may, in the future, have applications for setting iodine requirements in different population groups.

## Acknowledgments

The work reported herein has been carried out within the EURRECA Network of Excellence (<http://www.eurreca.org>), which is financially supported by the Commission of the European Communities. It was conducted under the

Sixth Framework Programme of the Frameworks Programmes for Research and Technological Development (RTD) in the Quality of Life and Management of Living Resources program, contract no. 036196. This report does not necessarily reflect the Commission's views or its future policy in this area. The original conception of the systematic review was undertaken by the EURRECA Network and coordinated by partners based at Wageningen University (WU), the Netherlands, and the University of East Anglia (UEA), United Kingdom. Susan Fairweather-Tait (UEA), Lisette de Groot (WU), Pieter van't Veer (WU), Kate Ashton (UEA), Amélie Casgrain (UEA), Adriënné Cavelaars (WU), Rachel Collings (UEA), Rosalie Dhonukshe-Rutten (WU), Esmée Doets (WU), Linda Harvey (UEA), and Lee Hooper (UEA) designed and developed the review protocol and search strategy.

The authors' responsibilities were as follows: DRM approved and screened the literature search, extracted data and assessed validity, conducted meta-analyses, tabulated the data, interpreted the data, designed the study, and wrote the manuscript. OWS and CD performed statistical transformations to derive coherent single-study estimates. AA, JT, GOP, and TP screened the results of the literature search and extracted the data. RC performed the electronic literature search, provided advice, and contributed to the writing of the manuscript. CD, MG, and MGU contributed to the writing of the manuscript. AC, LdG, and PvV designed the study and provided advice. All authors contributed to the subsequent drafts of the manuscript and approved the submitted version.

**Declaration of interest.** The authors have no relevant interests to declare.

**Funding.** The work reported herein has been carried out within the EURRECA Network of Excellence (<http://www.eurreca.org>) which is financially supported by the Commission of the European Communities, specific Research, Technology and Development (RTD) Programme Quality of Life and Management of Living Resources, within the Sixth Framework Programme, contract no. 036196. This report does not necessarily reflect the Commission's views or its future policy in this area. DRM, JT, GPO, MG, MGU AA, and TA were supported by the Ministry of Education and Science of Republic Serbia, Project III No 41030.

## REFERENCES

1. Pérez-López FR. Iodine and thyroid hormones during pregnancy and postpartum. *Gynecol Endocrinol*. 2007;23:414–428.
2. Laurberg P, Cerqueira C, Ovesen L, et al. Iodine intake as a determinant of thyroid disorders in populations. *Best Pract Res Clin Endocrinol Metab*. 2010;24:13–27.
3. World Health Organization, Food and Agricultural Organization of the United Nations. *Vitamin and Mineral Requirements in Human Nutrition. Report of a joint FAO/WHO expert consultation*. 2<sup>nd</sup> ed. Geneva, Switzerland: World Health Organization; 2004.

4. Haldimann M, Alt A, Blanc A, et al. Iodine content of food groups. *J Food Compos Anal.* 2005;18:461–471.
5. Fairweather-Tait S, Hurrell RF. Bioavailability of minerals and trace elements. *Nutr Res Rev.* 1996;9:295–324.
6. World Health Organization. *Iodine Deficiency in Europe: A Continuing Health Problem.* Geneva, Switzerland: WHO; 2007.
7. World Health Organization, United Nations Children's Fund, International Council for the Control of Iodine Deficiency Disorders. *Assessment of Iodine Deficiency Disorders and Monitoring Their Elimination.* 3rd ed. Geneva, Switzerland: WHO; 2007.
8. Andersson M, de Benoist B, Delange F, et al. Prevention and control of iodine deficiency in pregnant and lactating women and in children less than 2-years-old: conclusions and recommendations of the Technical Consultation. *Public Health Nutr.* 2007;10(12A):1606–1611.
9. Zimmermann MB, Andersson M. Prevalence of iodine deficiency in Europe in 2010. *Ann Endocrinol (Paris).* 2011;72:164–166.
10. Gibson RS. *Principles of Nutritional Assessment*, 2nd ed. New York, NY: Oxford University Press; 2005.
11. Zimmermann MB. Methods to assess iron and iodine status. *Br J Nutr.* 2008;99(Suppl 3):S2–S9.
12. Ristic-Medic D, Pistackova Z, Hooper L, et al. Methods of assessment of iodine status in humans: a systematic review. *Am J Clin Nutr.* 2009;89(Suppl 6):S2052–S2069.
13. Souverein OW, Dullemeijer C, van't Veer P, et al. Transformations of summary statistics as input in meta-analysis for linear dose-response models on a logarithmic scale: a methodology developed within EURRECA. *BMC Med Res Methodol.* 2012;12:57–70.
14. Dunn J, Van der Haar F. Detection of iodine deficiency. In: *A practical guide to the correction of iodine deficiency. Technical manual no. 3.* The Netherlands: ICCIDD/UNICEF/WHO; 1990:13–20.
15. Institute of Medicine, Food and Nutrition Board. Iodine. In: *Dietary Reference Intakes for Vitamin A, Vitamin K, Arsenic, Boron, Chromium, Copper, Iodine, Iron, Manganese, Molybdenum, Nickel, Silicon, Vanadium, and Zinc.* Washington, DC: National Academies Press; 2001:258–289.
16. Mattsson S, Lindstrom S. Diuresis and voiding pattern in healthy schoolchildren. *Br J Urol.* 1995;76:783–789.
17. Zimmermann MB. Iodine deficiency in pregnancy and the effects of maternal iodine supplementation on the offspring: a review. *Am J Clin Nutr.* 2009;89(Suppl 2):668S–672S.
18. Zimmermann MB. The impact of iodised salt or iodine supplements on iodine status during pregnancy, lactation and infancy. *Public Health Nutr.* 2007;10(12A):1584–1595.
19. Glinooer D. The importance of iodine nutrition during pregnancy. *Public Health Nutr.* 2007;10(12A):1542–1546.
20. Kung AW. Iodine nutrition of pregnant and lactating women in Hong Kong, where intake is of borderline sufficiency. *Public Health Nutr.* 2007;10(12A):1600–1601.
21. de Escobar GM, Obregón MJ, del Rey FE. Iodine deficiency and brain development in the first half of pregnancy. *Public Health Nutr.* 2007;10(12A):1554–1570.
22. Glinooer D. Clinical and biological consequences of iodine deficiency during pregnancy. *Endocr Dev.* 2007;10:62–85.
23. Ibrahim M, Sinn J, Mc Guir W. Iodine supplementation for the prevention of mortality and adverse neurodevelopmental outcomes in preterm infants. *Cochrane Database Syst Rev.* 2006;(2):CD005253.
24. Mahomed K, Gulmezoglu AM. Maternal iodine supplements in areas of deficiency. *Cochrane Database Syst Rev.* 2006;(3):CD000135.
25. Qian M, Wang D, Watkins WE, et al. The effects of iodine on intelligence in children: a meta-analysis of studies conducted in China. *Asia Pac J Clin Nutr.* 2005;14:32–42.
26. Angermayr L, Clar C. Iodine supplementation for preventing iodine deficiency disorders in children. *Cochrane Database Syst Rev.* 2004;(2):CD003819.
27. Zimmermann M, Delange F. Iodine supplementation of pregnant women in Europe: a review and recommendations. *Eur J Clin Nutr.* 2004;58:979–984.
28. Wu T, Liu GJ, Li P, et al. Iodised salt for preventing iodine deficiency disorders. *Cochrane Database Syst Rev.* 2002;(3):CD003204.
29. Delange F. The role of iodine in brain development. *Proc Nutr Soc.* 2000;59:75–79.
30. Delange F. Administration of iodized oil during pregnancy: a summary of the published evidence. *Bull World Health Organ.* 1996;74:101–108.
31. Glinooer D. The regulation of thyroid function in pregnancy: pathways of endocrine adaptation from physiology to pathology. *Endocr Rev.* 1997;18:404–433.
32. Higgins JPT, Green S, eds. *Cochrane Handbook for Systematic Reviews of Interventions, version 5.0.2 [updated September 2009].* The Cochrane Library, Issue 4. Chichester, UK: John Wiley & Sons, Ltd; 2009.
33. Abuye C, Hailemariam B, Tibe HN, et al. The effect of varying doses of oral iodized oil in the prophylaxis of endemic goitre in elementary school children. *Ethiop Med J.* 1995;33:115–123.
34. Bautista A, Barker PA, Dunn JT, et al. The effects of oral iodized oil on intelligence, thyroid status, and somatic growth in school-age children from an area of endemic goiter. *Am J Clin Nutr.* 1982;35:127–134.
35. Benmiloud M, Chauoki ML, Gutekunst R, et al. Oral iodised oil for correcting iodine deficiency: optimal dosing and outcome indicator selection. *J Clin Endocrinol Metab.* 1994;79:20–24.
36. Furnée CA, West CE, van der Haar F, et al. Efficacy of oral iodised oil is associated with anthropometric status in severely iodine-deficient schoolchildren in rural Malawi. *Br J Nutr.* 2000;84:345–352.
37. Gordon R, Rose MC, Skeaff SA, et al. Iodine supplementation improves cognition in mildly iodine-deficient children. *Am J Clin Nutr.* 2009;90:1264–1271.
38. Huda SN, Grantham-McGregor SM. Cognitive and motor functions of iodine-deficient but euthyroid children in Bangladesh do not benefit from iodized poppy seed oil (Lipiodol). *J Nutr.* 2001;131:72–77.
39. Hintze G, Emrich D, Richter K, et al. Effect of voluntary intake of iodination salt on prevalence of goitre in children. *Acta Endocrinol (Copenh).* 1988;117:333–338.
40. Tajtáková M, Langer P, Gonsorcíková V, et al. Recognition of a subgroup of adolescents with rapidly growing thyroids under iodine-replete conditions: seven year follow-up. *Eur J Endocrinol.* 1998;138:674–680.
41. Untoro J, Schultink W, West CE, et al. Efficacy of oral iodized peanut oil is greater than that of iodized poppy seed oil among Indonesian schoolchildren. *Am J Clin Nutr.* 2006;84:1208–1214.
42. van den Briel T, West CE, Bleichrodt N, et al. Improved iodine status is associated with improved mental performance of schoolchildren in Benin. *Am J Clin Nutr.* 2000;72:1179–1185.
43. van den Briel T, West CE, Hautvast JG, et al. Serum thyroglobulin and urinary iodine concentration are the most appropriate indicators of iodine status and thyroid function under conditions of increasing iodine supply in schoolchildren in Benin. *J Nutr.* 2001;131:2701–2706.
44. Zhao J, Xu F, Zhang Q, et al. Randomized clinical trial comparing different iodine interventions in school children. *Public Health Nutr.* 1999;2:173–178.
45. Zimmermann MB, Connolly K, Bozo M, et al. Iodine supplementation improves cognition in iodine-deficient schoolchildren in Albania: a randomized, controlled, double-blind study. *Am J Clin Nutr.* 2006;83:108–114.
46. Gardner DF, Centor RM, Utiger RD. Effects of low dose oral iodide supplementation on thyroid function in normal men. *Clin Endocrinol (Oxf).* 1988;28:283–288.
47. Elmagar B, Eltom M, Karlsson FA, et al. The effects of different doses of oral iodized oil on goiter size, urinary iodine, and thyroid-related hormones. *J Clin Endocrinol Metab.* 1995;80:891–897.
48. Kahaly G, Dienes HP, Beyer J, et al. Randomized, double blind, placebo-controlled trial of low dose iodide in endemic goiter. *J Clin Endocrinol Metab.* 1997;82:4049–4053.
49. Kahaly G, Dienes HP, Beyer J, et al. Iodide induces thyroid autoimmunity in patients with endemic goitre: a randomised, double-blind, placebo-controlled trial. *Eur J Endocrinol.* 1998;139:290–297.
50. Paul T, Meyers B, Witorsch RJ, et al. The effect of small increases in dietary iodine on thyroid function in euthyroid subjects. *Metabolism.* 1988;37:121–124.
51. Phillips DI, Lusty T, Osmond C, et al. Iodine supplementation: comparison of oral or intramuscular iodized oil with oral potassium iodide. A controlled trial in Zaire. *Int J Epidemiol.* 1988;17:142–147.
52. Tonglet R, Bourdoux P, Minga T, et al. Efficacy of low oral doses of iodized oil in the control of iodine deficiency in Zaire. *N Engl J Med.* 1992;326:236–241.
53. Antonangeli L, Maccherini D, Cavaliere R, et al. Comparison of two different doses of iodide in the prevention of gestational goiter in marginal iodine deficiency: a longitudinal study. *Eur J Endocrinol.* 2002;147:29–34.
54. Glinooer DP, De Nayer P, Delange F, et al. A randomized trial for the treatment of mild iodine deficiency during pregnancy: maternal and neonatal effects. *J Clin Endocrinol Metab.* 1995;80:258–269.
55. Liesenkötter KP, Göpel W, Bogner U, et al. Earliest prevention of endemic goiter by iodine supplementation during pregnancy. *Eur J Endocrinol.* 1996;134:443–448.
56. Pedersen KM, Laurberg P, Iversen E, et al. Amelioration of some pregnancy-associated variations in thyroid function by iodine supplementation. *J Clin Endocrinol Metab.* 1993;77:1078–1083.
57. Reinhardt W, Kohl S, Holtermann D, et al. Efficacy and safety of iodine in the postpartum period in an area of mild iodine deficiency. *Eur J Med Res.* 1998;3:203–210.
58. Romano R, Jannini EA, Pepe M, et al. The effects of iodophylaxis on thyroid size during pregnancy. *Am J Obstet Gynecol.* 1991;164:482–485.
59. Silva JE, Silva S. Interrelationships among serum thyroxine, triiodothyronine, reverse triiodothyronine, and thyroid-stimulating hormone in iodine-deficient pregnant women and their offspring: effects of iodine supplementation. *J Clin Endocrinol Metab.* 1981;52:671–677.
60. Leisner B, Henrich B, Knoff D, et al. Effects of iodide treatment on iodine concentration and volume of endemic non toxic goitre in childhood. *Acta Endocrinol (Copenh).* 1985;108:44–50.
61. Malone FJ, Strain JJ, Gray AM, et al. Iodine supplementation: a comparison of oral and intramuscular methods in the improvement of thyroid function and prophylaxis of goitre. *Trace Elem Electrolytes.* 1996;13:133–135.



62. Reinhardt W, Holtermann D, Benker G, et al. Effect of small doses of iodine on thyroid function during caloric restriction in normal subjects. *Horm Res.* 1993;39:132–137.
63. Nohr SB, Laurberg P. Opposite variations in maternal and neonatal thyroid function induced by iodine supplementation during pregnancy. *J Clin Endocrinol Metab.* 2000;85:623–627.
64. Nohr SB, Jorgensen A, Pedersen KM, et al. Postpartum thyroid dysfunction in pregnant thyroid peroxidase antibody-positive women living in an area with mild to moderate iodine deficiency: is iodine supplementation safe? *J Clin Endocrinol Metab.* 2000;85:3191–3198.
65. Rogahn J, Ryan S, Wells J, et al. Randomised trial of iodine intake and thyroid status in preterm infants. *Arch Dis Child Fetal Neonatal Ed.* 2000;83:F86–F90.
66. Ojule AC, Osotimehin BO. The influence of iodine deficiency on the cognitive performance of school children in Saki, South-West Nigeria. *Afr J Med Sci.* 1998;27:95–99.
67. Simescu M, Varciu M, Nicolaescu E, et al. Iodized oil as a complement to iodized salt in schoolchildren in endemic goiter in Romania. *Horm Res.* 2002;58:78–82.
68. Zimmermann MB, Adou P, Torresani T, et al. Low dose oral iodized oil for control of iodine deficiency in children. *Br J Nutr.* 2000;84:139–141.
69. Zimmermann MB, Moretti D, Chaouki N, et al. Development of a dried whole-blood spot thyroglobulin assay and its evaluation as an indicator of thyroid status in goitrous children receiving iodized salt. *Am J Clin Nutr.* 2003;77:1453–1458.
70. Zimmermann MB, Wegmuller R, Zeder C, et al. Rapid relapse of thyroid dysfunction and goiter in school-age children after discontinuation of salt iodization. *Am J Clin Nutr.* 2004;79:642–645.
71. Zimmermann MB, Ito Y, Hess SY. High thyroid volume in children with excess dietary iodine intakes. *Am J Clin Nutr.* 2005;81:840–844.
72. Zimmermann M, de Benoist B, Corigliano S, et al. Assessment of iodine status using dried blood spot thyroglobulin: development of reference material and establishment of an international reference range in iodine-sufficient children. *J Clin Endocrinol Metab.* 2006;91:4881–4887.
73. Rasmussen LB, Ovesen L, Jorgensen T, et al. Dietary iodine intake and urinary iodine excretion in a Danish population: effect of geography, supplements and food choice. *Br J Nutr.* 2002;87:61–69.
74. Rasmussen LB, Carle A, Jorgensen T, et al. Iodine intake before and after mandatory iodization in Denmark: results from the Danish Investigation of Iodine Intake and Thyroid Diseases (DanThyr) study. *Br J Nutr.* 2008;100:166–173.
75. Squatrito SF, Delange F, Trimarchi F, et al. Endemic cretinism in Sicily. *J Endocrinol Invest.* 1981;4:295–302.
76. Teng W, Shan Z, Teng X, et al. Effect of iodine intake on thyroid diseases in China. *N Engl J Med.* 2006;354:2783–2793.
77. Torheim LE, Granli GI, Sidibe CS, et al. Women's iodine status and its determinants in an iodine-deficient area in the Kayes region, Mali. *Public Health Nutr.* 2005;8:387–394.
78. Andersen S, Iversen F, Terpling S, et al. More hypothyroidism and less hyperthyroidism with sufficient iodine nutrition compared to mild iodine deficiency – a comparative population-based study of older people. *Maturitas.* 2009;64:126–131.
79. Laurberg PK, Pedersen M, Hreidarsson A, et al. Iodine intake and the pattern of thyroid disorders: a comparative epidemiological study of thyroid abnormalities in the elderly in Iceland and in Jutland, Denmark. *J Clin Endocrinol Metab.* 1998;83:765–769.
80. Guan H, Shan Z, Teng X, et al. Influence of iodine on the reference interval of TSH and the optimal interval of TSH: results of a follow-up study in areas with different iodine intakes. *Clin Endocrinol (Oxf).* 2008;69:136–141.
81. Mian C, Vitaliano P, Pozza D, et al. Iodine status in pregnancy: role of dietary habits and geographical origin. *Clin Endocrinol (Oxf).* 2009;70:776–780.
82. Mezosi E, Molnar I, Jakab A, et al. Prevalence of iodine deficiency and goitre during pregnancy in east Hungary. *Eur J Endocrinol.* 2000;143:479–483.
83. Moleti M, Lo Presti VP, Campolo MC, et al. Iodine prophylaxis using iodized salt and risk of maternal thyroid failure in conditions of mild iodine deficiency. *J Clin Endocrinol Metab.* 2008;93:2616–2621.
84. Zimmermann MB, Aeberli I, Torresani T, et al. Increasing the iodine concentration in the Swiss iodized salt program markedly improved iodine status in pregnant women and children: a 5-y prospective national study. *Am J Clin Nutr.* 2005;82:388–392.
85. Klett M, Ohlig M, Manz F, et al. Effect of iodine supply on neonatal thyroid volume and TSH. *Acta Paediatr.* 1999;88(Suppl 432):18–20.
86. Velasco I, Carreira M, Santiago P, et al. Effect of iodine prophylaxis during pregnancy on neurocognitive development of children during the first two years of life. *J Clin Endocrinol Metab.* 2009;94:3234–3241.
87. Ares S, Escobar-Morreale HF, Quero J, et al. Neonatal hypothyroxinaemia: effects of iodine intake and premature birth. *J Clin Endocrinol Metab.* 1997;82:1704–1712.
88. Chung HR, Shin CH, Yang SW, et al. Subclinical hypothyroidism in Korean preterm infants associated with high levels of iodine in breast milk. *J Clin Endocrinol Metab.* 2009;4:4444–4447.
89. Kurtoglu S, Akcakus M, Kocaoglu C, et al. Iodine status remains critical in mother and infant in Central Anatolia (Kayseri) of Turkey. *Eur J Nutr.* 2004;43:297–303.
90. Ojule AC, Osotimehin BO. Maternal and neonatal thyroid status in Saki, Nigeria. *Afr J Med Sci.* 1998;27:57–61.
91. Ristić-Medić D, Novakovic R, Glibetic M, et al. EURRECA – Estimating iodine requirements for deriving dietary reference values. *Crit Rev Food Sci Nutr.* 2013;53:1051–1063.
92. World Health Organization. Vitamin and Mineral Nutrition Information System (VMNIS). Database on Iodine Deficiency Disorders. Available at: <http://www.who.int/vmnis/iodine/data/en/index.html>. Accessed November 24, 2010.
93. Knudsen N, Bulow I, Jorgensen T, et al. Serum Tg – a sensitive marker of thyroid abnormalities and iodine deficiency in epidemiological studies. *J Clin Endocrinol Metab.* 2001;86:3599–3603.

## SUPPORTING INFORMATION

Additional Supporting Information may be found in the online version of this article at the publisher's website:

**Table S1 Search terms used and results for the Embase , Medline, and Cochrane databases.**

**Table S2 General characteristics of observational studies (n = 30) reporting the effect of dietary iodine intake on UI, TSH, and Tg in different population groups.**
